# Supplementary material for: Synthesis and optoelectronic investigations of triarylamines based on naphtho[2,3-f]quinoxaline-7,12-dione core as donor–acceptors for n-type materials
Source: Royal Society of Chemistry journal article supplement (doi:10.1039/c6ra11149a), 2016-01-01
Supplement: c6ra11149a1.pdf [file c6ra11149a1.pdf]

# **Synthesis and Optoelectronic Investigations of Triarylamines based on naphtho[2,3-*f*]quinoxaline-7,12-dione core as Donor-Acceptors for n-type materials**

**Azam M. Shaikh,<sup>a</sup> Bharat K. Sharma,<sup>a</sup> Sajeev Chacko<sup>b</sup> and Rajesh M. Kamble<sup>\*a</sup>**

*<sup>a</sup>Department of Chemistry, University of Mumbai, Santacruz (East), Mumbai–400 098, India*

*<sup>b</sup>Department of Physics, University of Mumbai, Santacruz (East), Mumbai–400 098, India*

\*Email: [kamblerm@chem.mu.ac.in](mailto:kamblerm@chem.mu.ac.in)

**Supplementary Information**

|                                                                                                                                  |       |
|----------------------------------------------------------------------------------------------------------------------------------|-------|
| 1) Mass spectra of compound <b>1</b> .....                                                                                       | 3     |
| 2) HRMS spectra of compounds <b>2-7</b> .....                                                                                    | 4-9   |
| 3) FTIR Spectra of compounds <b>1-7</b> .....                                                                                    | 10-13 |
| 4) <sup>1</sup> H and <sup>13</sup> C NMR spectra of compounds <b>1-7</b> .....                                                  | 14-20 |
| 5) Photophysical data of compounds <b>2-7</b> in various solvents.....                                                           | 21-22 |
| 6) Absorption spectra of compound <b>1</b> in toluene.....                                                                       | 23    |
| 7) Absorption and Emission spectra of compound <b>2-7</b> in various solvents.....                                               | 24-26 |
| 8) Cyclic voltammetry (CV) and Differential Pulse Voltammetry (DPV)<br>of compounds <b>1-7</b> in anhydrous dichloromethane..... | 27-29 |
| 9) Optimized structures of compounds <b>2-7</b> .....                                                                            | 30-35 |
| 10) Frontier molecular orbital of compounds <b>4-7</b> .....                                                                     | 36-37 |
| 11) Differential Scanning Calorimetry (DSC) and Derivative weight loss<br>plot of compounds <b>2-7</b> .....                     | 38    |
| 12) Glass transition temperature plots of compounds <b>4-6</b> .....                                                             | 39    |
| 13) Cartesian coordinates of compounds <b>2-7</b> .....                                                                          | 40-62 |
| <b>a. Table S1.</b> Cartesian coordinates of optimized structure of compound <b>2</b> .....                                      | 40-43 |
| <b>b. Table S2.</b> Cartesian coordinates of optimized structure of compound <b>2</b> .....                                      | 43-47 |
| <b>c. Table S3.</b> Cartesian coordinates of optimized structure of compound <b>2</b> .....                                      | 47-50 |
| <b>d. Table S4.</b> Cartesian coordinates of optimized structure of compound <b>2</b> .....                                      | 51-54 |
| <b>e. Table S5.</b> Cartesian coordinates of optimized structure of compound <b>2</b> .....                                      | 54-58 |
| <b>f. Table S6.</b> Cartesian coordinates of optimized structure of compound <b>2</b> .....                                      | 58-62 |

# 1. Mass spectra of compound 1

AZ-500 #207 RT: 2.90 AV: 1 NL: 2.96E5  
T: + c Full ms [50.00-1000.00]

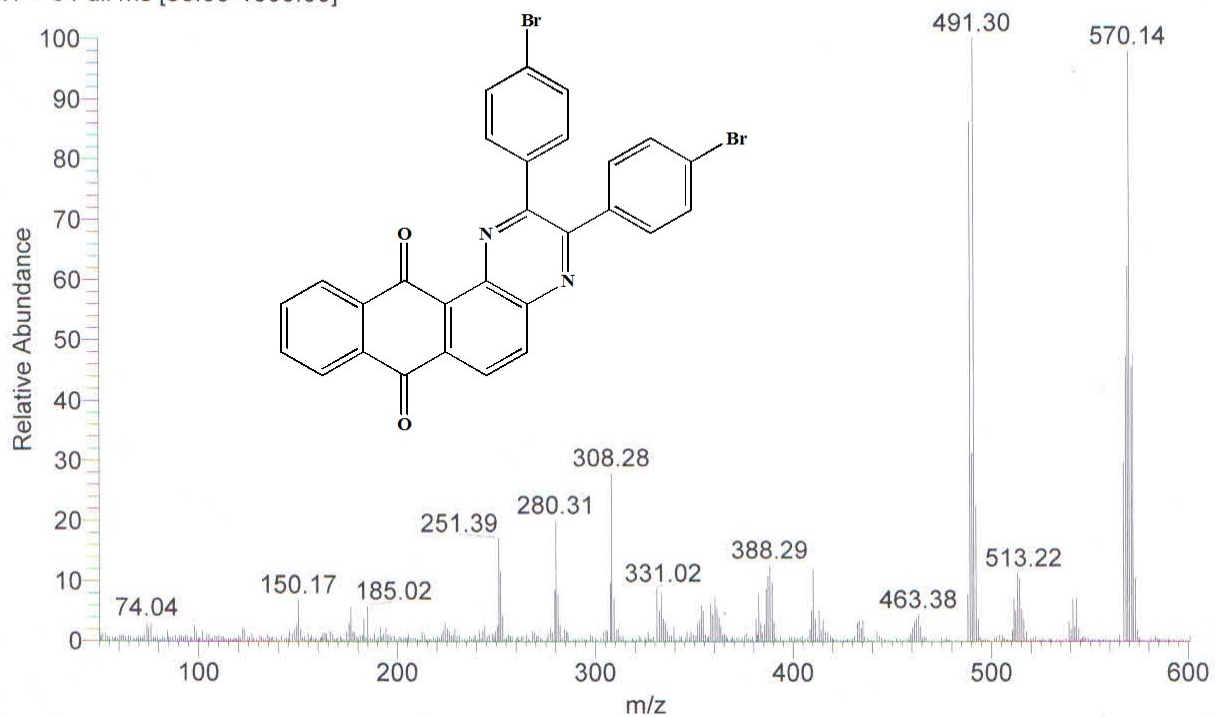

## 2. HRMS spectrum of compounds 2 7.

### DEPARTMENT OF CHEMISTRY, I.I.T.(B)

#### Analysis Info

Analysis Name D:\Data\DEC-15\EXT-UM-RNK-AZ-01.d  
Method Tune\_pos\_NAICSI-1000a.m  
Sample Name EXT-UM-RNK-AZ-01  
Comment C52H34N4O2

Acquisition Date 12/15/2015 11:14:28 A

Operator MR OUT  
Instrument maXis impact 282001.000t

#### Acquisition Parameter

Source Type ESI Ion Polarity Positive Set Nebulizer 0.3 Bar  
Focus Active Set Capillary 3700 V Set Dry Heater 180 °C  
Scan Begin 50 m/z Set End Plate Offset -500 V Set Dry Gas 4.0  
Scan End 1000 m/z Set Collision Cell RF 1200.0 Vpp Set Divert Valve I/min Source

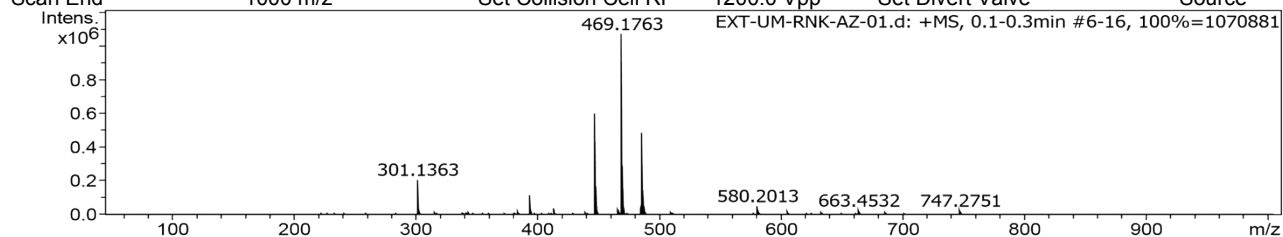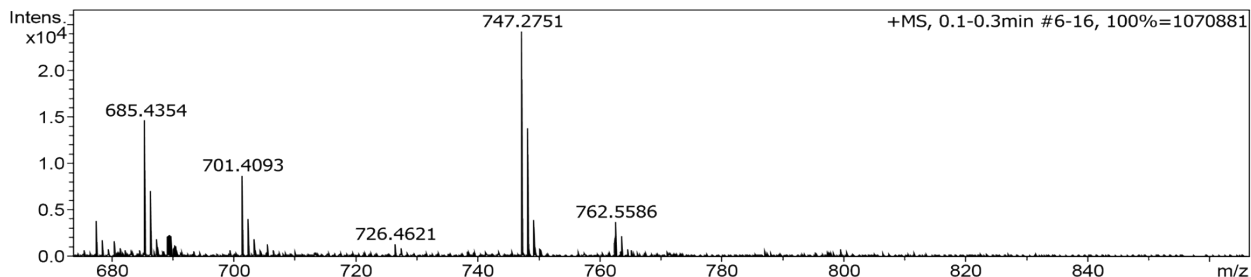

| Meas. m/z | # | Ion Formula | m/z      | err [ppm] | mSigma | # Sigma | Score  | rdb  | e <sup>-</sup> Conf | N-Rule |  |
|-----------|---|-------------|----------|-----------|--------|---------|--------|------|---------------------|--------|--|
| 747.2751  | 1 | C52H35N4O2  | 747.2755 | -0.5      | 16.7   | 1       | 100.00 | 37.5 | even                | ok     |  |

Figure S1: HRMS spectra of compound 2.

# DEPARTMENT OF CHEMISTRY, I.I.T.(B)

## Analysis Info

Analysis Name D:\Data\DEC-15\EXT-UM-RNK-AZ-02.d  
Method Tune\_pos\_NAICSI-1000a.m  
Sample Name EXT-UM-RNK-AZ-02  
Comment C60H38N4O2

Acquisition Date 12/15/2015 11:26:38 AM

Operator MR OUT  
Instrument maXis impact 282001.00081

## Acquisition Parameter

Source Type ESI Ion Polarity Positive Set Nebulizer 0.3 Bar  
Focus Active Set Capillary 3700 V Set Dry Heater 180 °C  
Scan Begin 50 m/z Set End Plate Offset -500 V Set Dry Gas 4.0  
I/min  
Scan End 1000 m/z Set Collision Cell RF 1200.0 Vpp Set Divert Valve Source

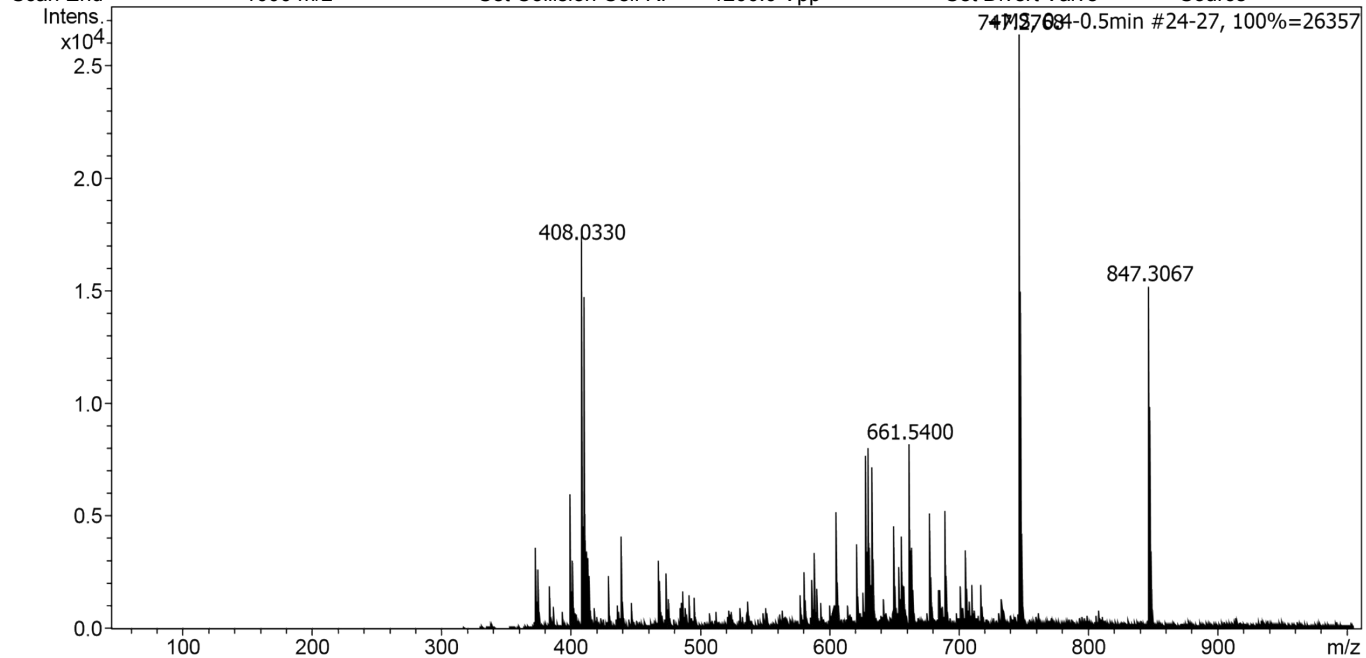

| Meas. m/z | # | Ion Formula | m/z      | err [ppm] | mSigma | # Sigma | Score  | rdb  | e <sup>-</sup> Conf | N-Rule |
|-----------|---|-------------|----------|-----------|--------|---------|--------|------|---------------------|--------|
| 847.3067  | 1 | C60H39N4O2  | 847.3068 | -0.1      | 10.8   | 1       | 100.00 | 43.5 | even                | ok     |

**Figure S2:** HRMS spectra of compound 3.

# DEPARTMENT OF CHEMISTRY, I.I.T.(B)

**Analysis Info**

Analysis Name D:\Data\DEC-15\EXT-UM-RNK-AZ-03.d  
 Method Tune\_pos\_NAICSI-1000a.m  
 Sample Name EXT-UM-RNK-AZ-03  
 Comment C56H42N4O6

Acquisition Date 12/15/2015 12:11:36 PM

Operator MR OUT  
 Instrument maXis impact 282001.00081

**Acquisition Parameter**

|             |          |                       |            |                  |           |
|-------------|----------|-----------------------|------------|------------------|-----------|
| Source Type | ESI      | Ion Polarity          | Positive   | Set Nebulizer    | 0.3 Bar   |
| Focus       | Active   | Set Capillary         | 3700 V     | Set Dry Heater   | 180 °C    |
| Scan Begin  | 50 m/z   | Set End Plate Offset  | -500 V     | Set Dry Gas      | 4.0 l/min |
| Scan End    | 1000 m/z | Set Collision Cell RF | 1200.0 Vpp | Set Divert Valve | Source    |

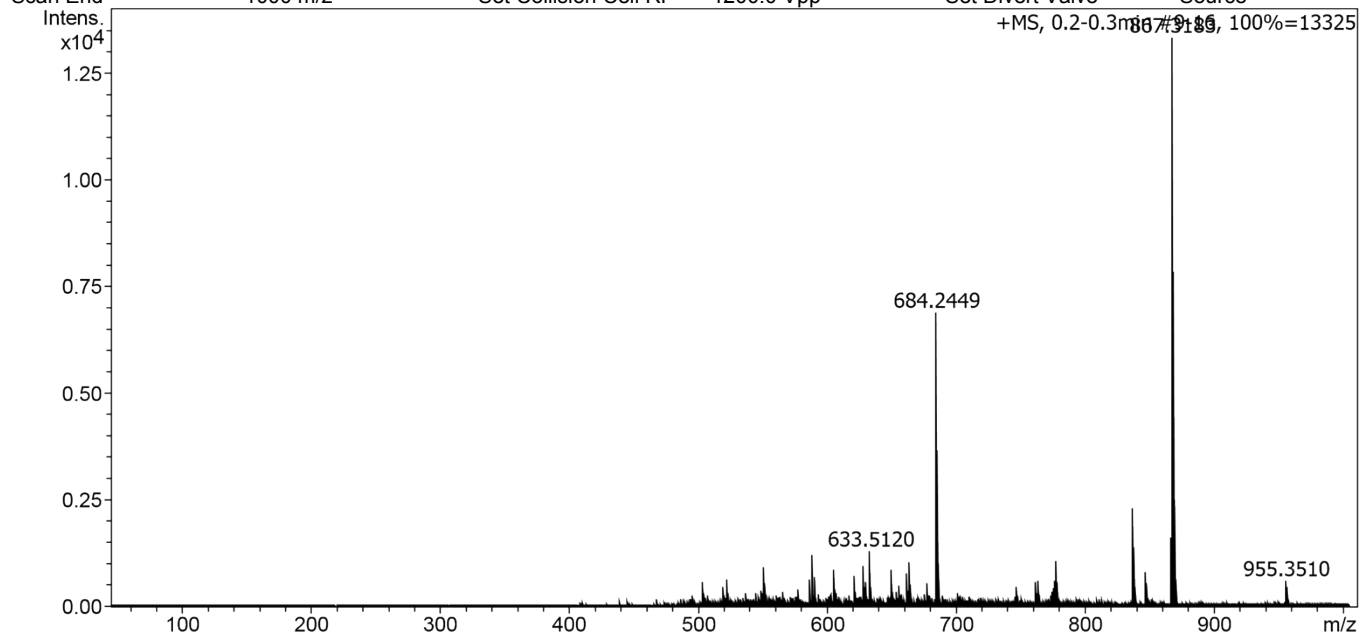

| Meas. m/z | # | Ion Formula | m/z      | err [ppm] | mSigma | # Sigma | Score  | rdb  | e <sup>-</sup> Conf | N-Rule |
|-----------|---|-------------|----------|-----------|--------|---------|--------|------|---------------------|--------|
| 867.3183  | 1 | C56H43N4O6  | 867.3177 | 0.7       | 19.3   | 1       | 100.00 | 37.5 | even                | ok     |

**Figure S3:** HRMS spectra of compound 4.

# DEPARTMENT OF CHEMISTRY, I.I.T.(B)

**Analysis Info**

Analysis Name D:\Data\DEC-15\EXT-UM-RNK-AZ-04.d  
 Method Tune\_pos\_NAICSI-1000a.m  
 Sample Name EXT-UM-RNK-AZ-04  
 Comment C52H32N6O6

Acquisition Date 12/15/2015 11:45:07 AM

Operator MR OUT  
 Instrument maXis impact 282001.00081

**Acquisition Parameter**

|             |          |                       |            |                  |           |
|-------------|----------|-----------------------|------------|------------------|-----------|
| Source Type | ESI      | Ion Polarity          | Positive   | Set Nebulizer    | 0.3 Bar   |
| Focus       | Active   | Set Capillary         | 3700 V     | Set Dry Heater   | 180 °C    |
| Scan Begin  | 50 m/z   | Set End Plate Offset  | -500 V     | Set Dry Gas      | 4.0 l/min |
| Scan End    | 1000 m/z | Set Collision Cell RF | 1200.0 Vpp | Set Divert Valve | Source    |

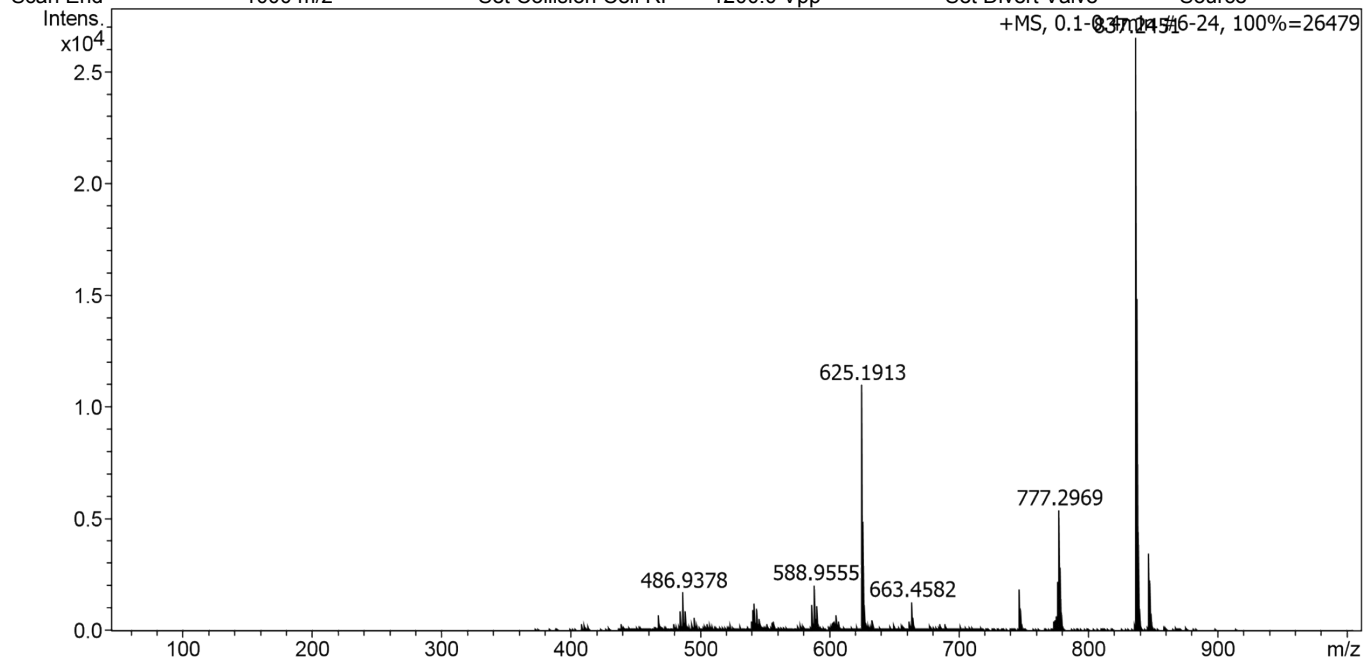

| Meas. m/z | # | Ion Formula | m/z      | err [ppm] | mSigma | # Sigma | Score  | rdb  | e <sup>-</sup> Conf | N-Rule |
|-----------|---|-------------|----------|-----------|--------|---------|--------|------|---------------------|--------|
| 837.2451  | 1 | C52H33N6O6  | 837.2456 | -0.6      | 15.7   | 1       | 100.00 | 39.5 | even                | ok     |

**Figure S4:** HRMS spectra of compound 5.

# DEPARTMENT OF CHEMISTRY, I.I.T.(B)

**Analysis Info**

Analysis Name D:\Data\DEC-15\EXT-UM-RNK-AZ- 05.d  
 Method Tune\_pos\_NAF\_1500.m  
 Sample Name EXT-UM-RNK-AZ- 05  
 Comment C64H42N8O2

Acquisition Date 12/15/2015 12:27:04 PM

Operator MR OUT  
 Instrument maXis impact 282001.00081

**Acquisition Parameter**

|             |          |                       |            |                  |           |
|-------------|----------|-----------------------|------------|------------------|-----------|
| Source Type | ESI      | Ion Polarity          | Positive   | Set Nebulizer    | 0.3 Bar   |
| Focus       | Active   | Set Capillary         | 3700 V     | Set Dry Heater   | 180 °C    |
| Scan Begin  | 50 m/z   | Set End Plate Offset  | -500 V     | Set Dry Gas      | 4.0 l/min |
| Scan End    | 1500 m/z | Set Collision Cell RF | 1800.0 Vpp | Set Divert Valve | Source    |

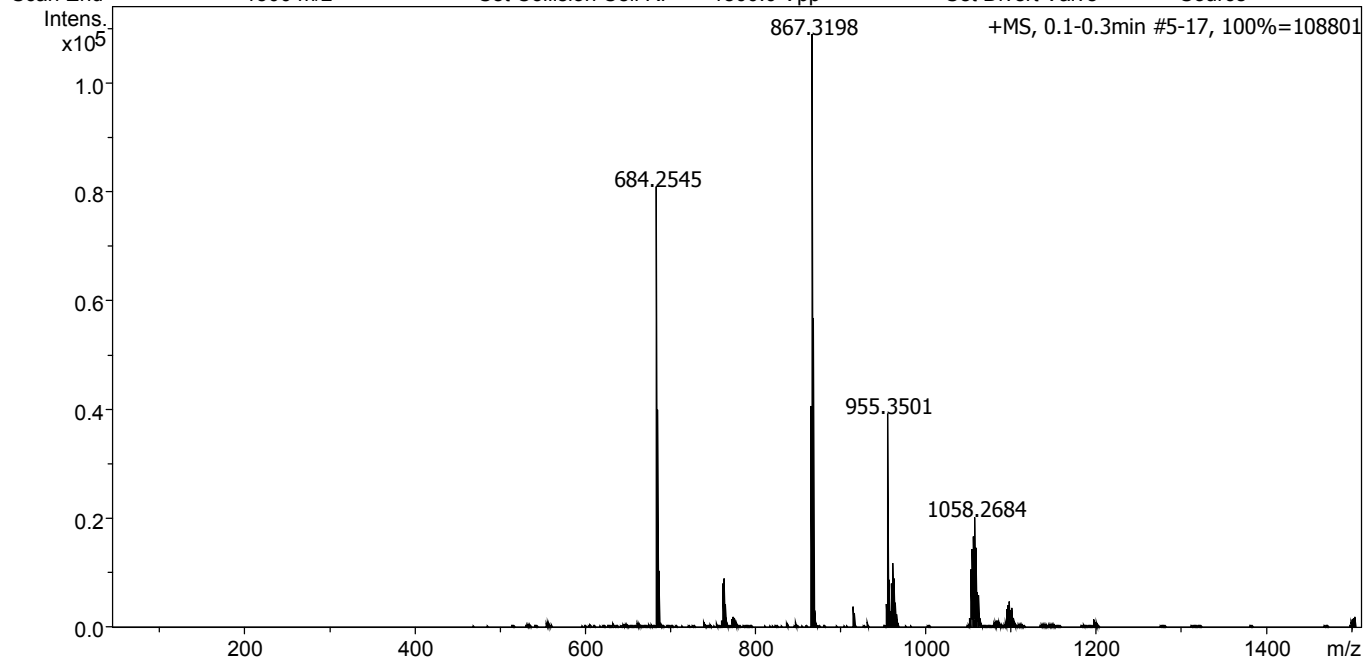

| Meas. m/z | # | Ion Formula | m/z      | err [ppm] | mSigma | # Sigma | Score  | rdb  | e <sup>-</sup> Conf | N-Rule |
|-----------|---|-------------|----------|-----------|--------|---------|--------|------|---------------------|--------|
| 955.3501  | 1 | C64H43N8O2  | 955.3503 | 0.3       | 32.9   | 1       | 100.00 | 47.5 | even                | ok     |

**Figure S5:** HRMS spectra of compound **6**.



# DEPARTMENT OF CHEMISTRY, I.I.T.(B)

## Analysis Info

Analysis Name D:\Data\DEC-15\EXT-UM-RNK-AZ-06.d  
Method Tune\_pos\_NAICSI-1000a.m  
Sample Name EXT-UM-RNK-AZ-06  
Comment C52H36N6O2

Acquisition Date 12/15/2015 11:33:26 AM

Operator MR OUT  
Instrument maXis impact 282001.00081

## Acquisition Parameter

|             |          |                       |            |                  |           |
|-------------|----------|-----------------------|------------|------------------|-----------|
| Source Type | ESI      | Ion Polarity          | Positive   | Set Nebulizer    | 0.3 Bar   |
| Focus       | Active   | Set Capillary         | 3700 V     | Set Dry Heater   | 180 °C    |
| Scan Begin  | 50 m/z   | Set End Plate Offset  | -500 V     | Set Dry Gas      | 4.0 l/min |
| Scan End    | 1000 m/z | Set Collision Cell RF | 1200.0 Vpp | Set Divert Valve | Source    |

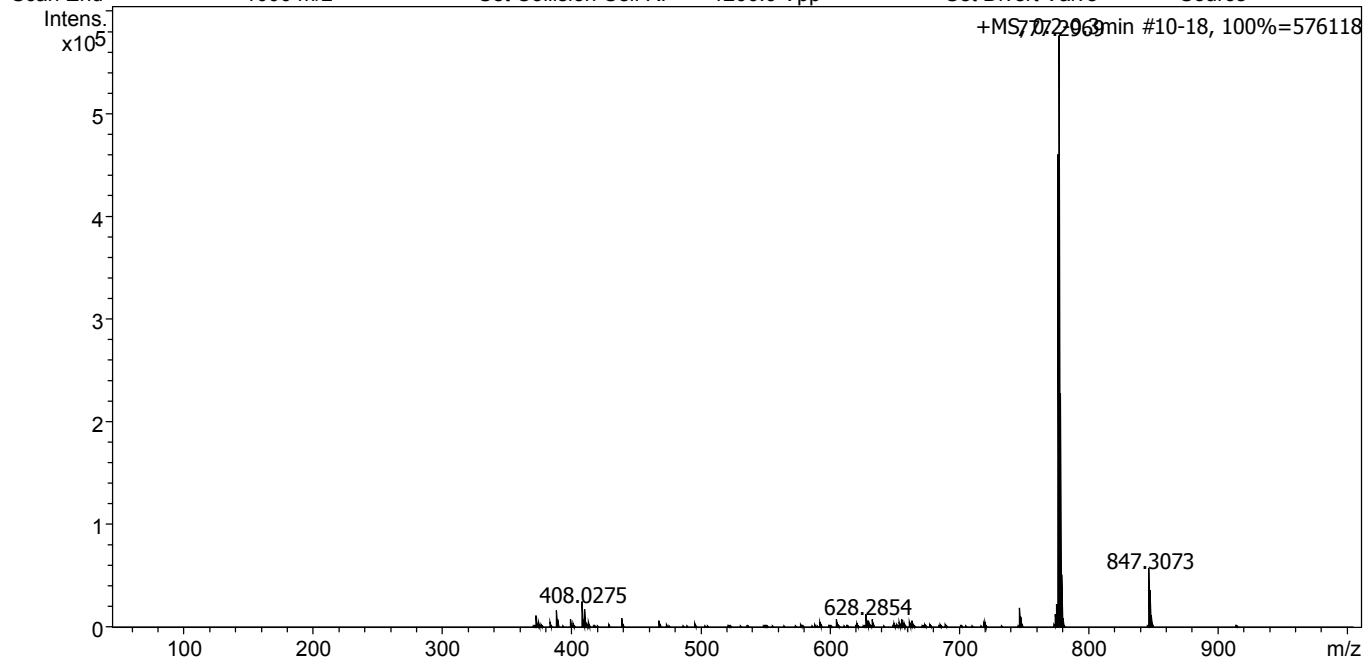

| Meas. m/z | # | Ion Formula | m/z      | err [ppm] | mSigma | # Sigma | Score  | rdb  | e <sup>-</sup> Conf | N-Rule |
|-----------|---|-------------|----------|-----------|--------|---------|--------|------|---------------------|--------|
| 777.2969  | 1 | C52H37N6O2  | 777.2973 | 0.4       | 95.5   | 1       | 100.00 | 37.5 | even                | ok     |

**Figure S6:** HRMS spectra of compound 7.

### 3. FTIR spectrum of compounds 1 7.

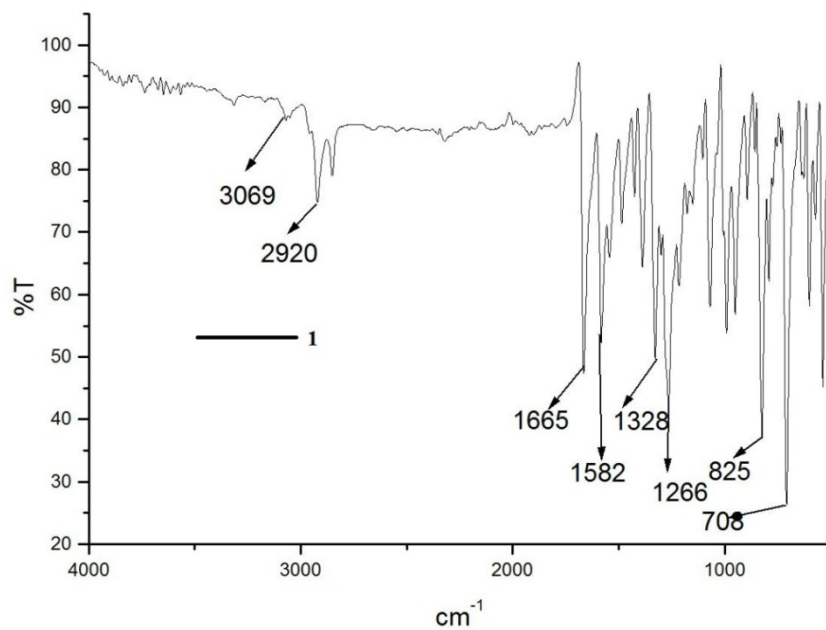

Figure S7: FTIR spectra of compound 1.

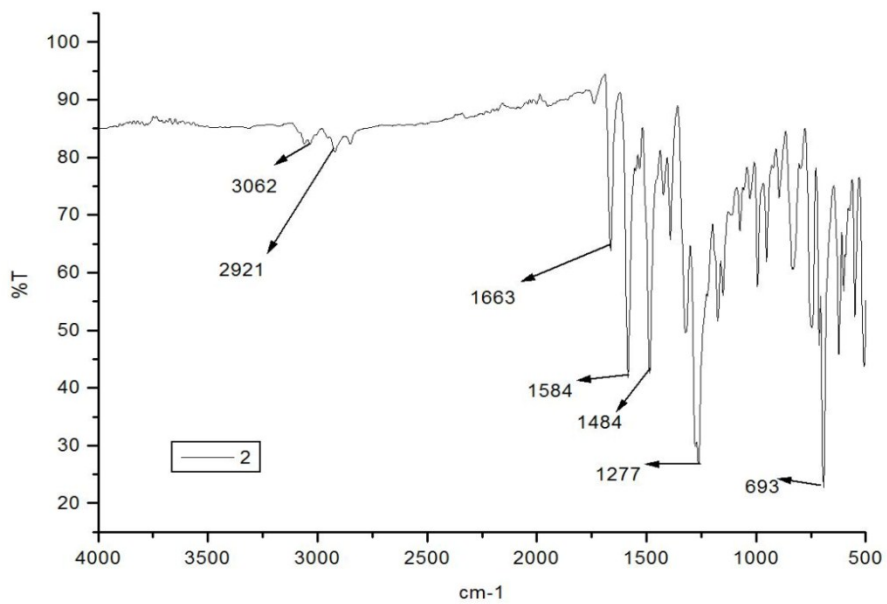

Figure S8: FTIR spectra of compound 2.

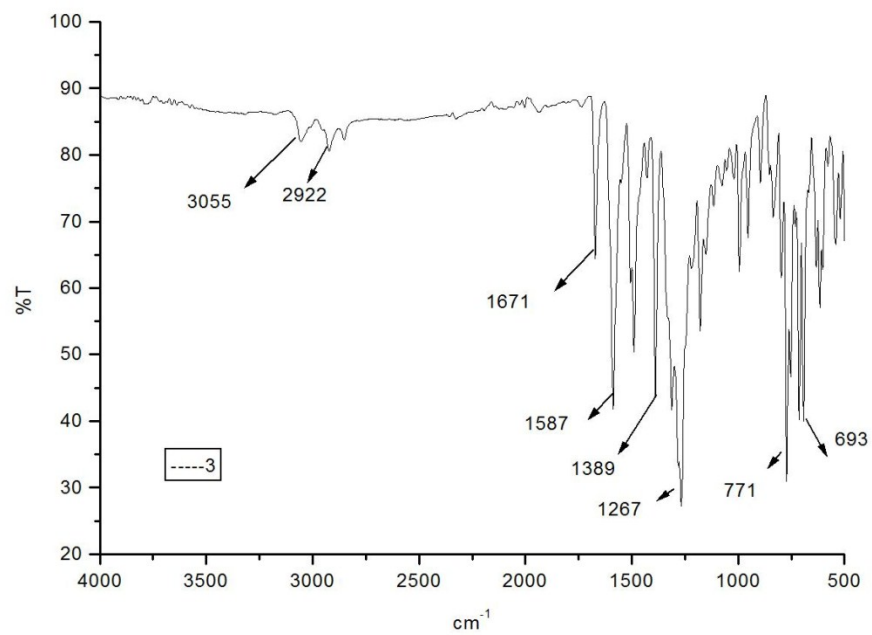

**Figure S9:** FTIR spectra of compound 3.

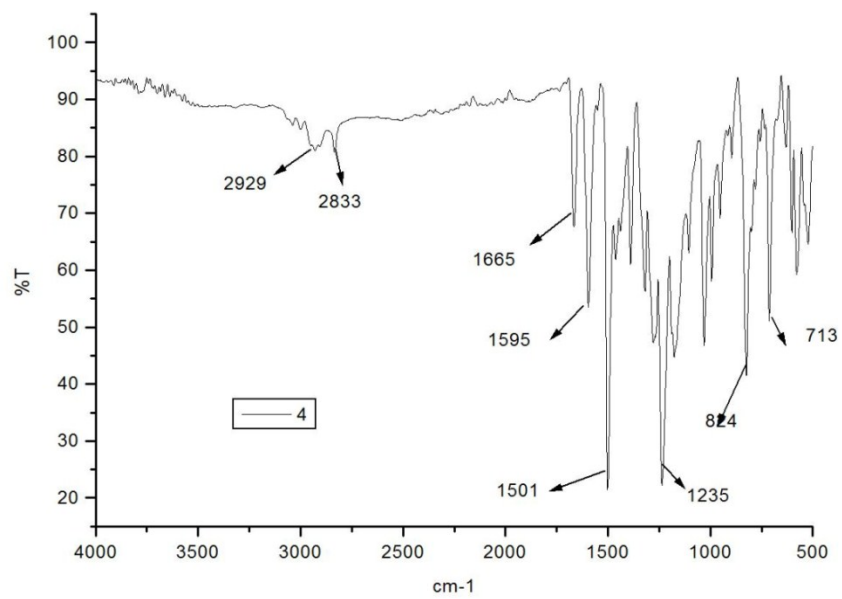

**Figure S10:** FTIR spectra of compound 4.

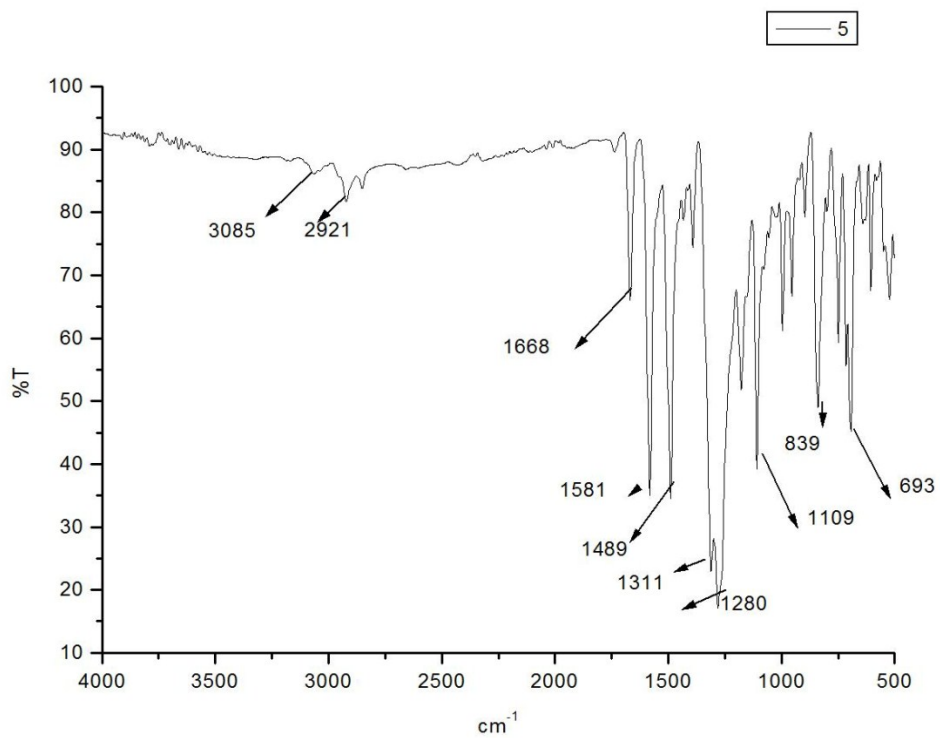

**Figure S11:** FTIR spectra of compound **5**

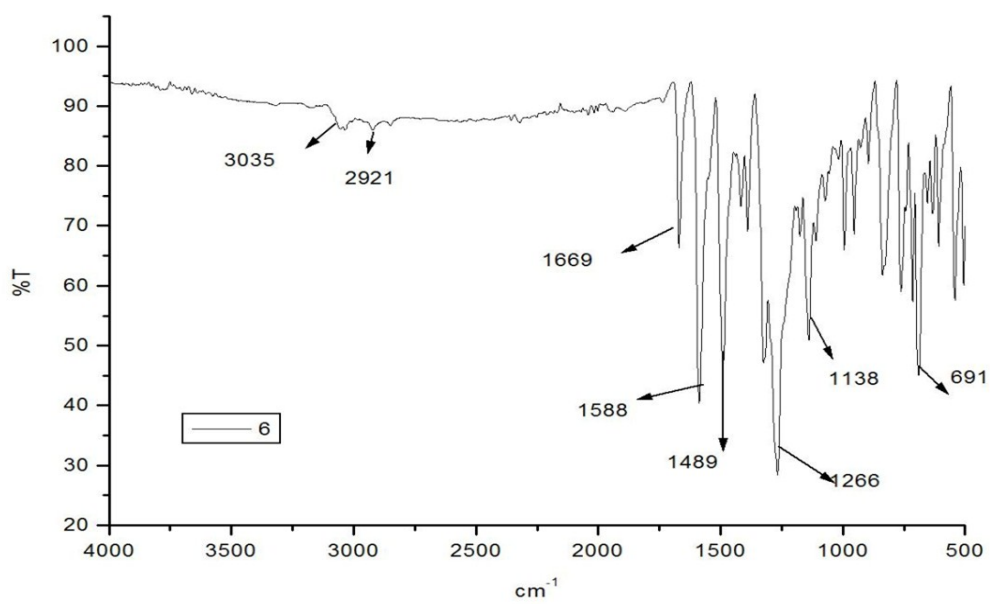

**Figure S12:** FTIR spectra of compound **6**.

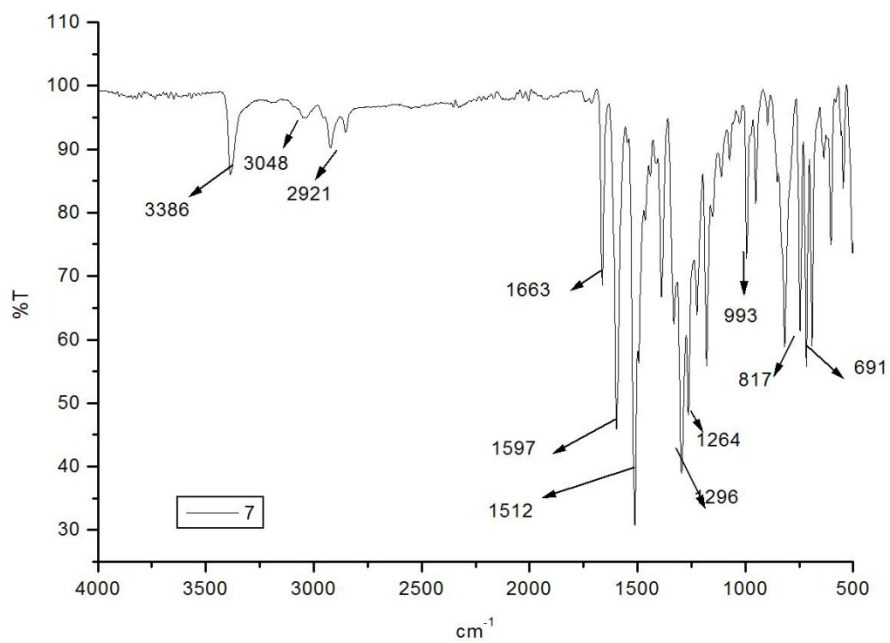

**Figure S13:** FTIR spectra of compound 7.

#### 4. $^1\text{H-NMR}$ and $^{13}\text{C-NMR}$ spectrum of compounds 1-7.

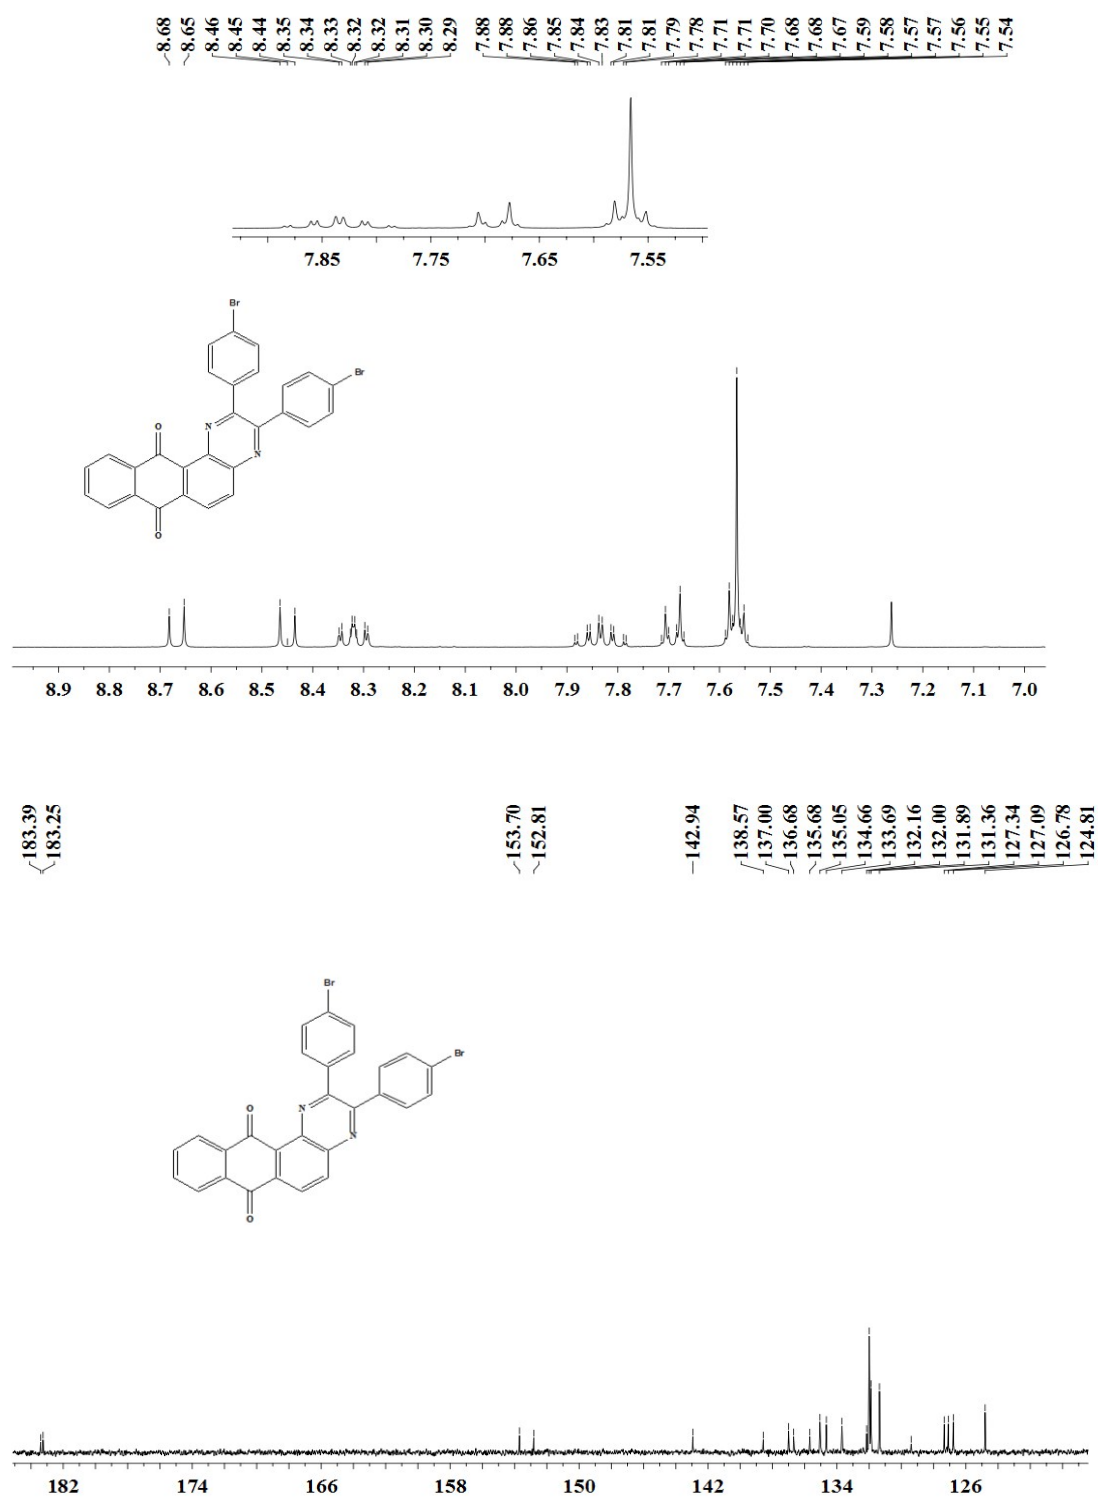

Figure S14:  $^1\text{H-NMR}$  and  $^{13}\text{C-NMR}$  spectra of compound 1 in  $\text{CDCl}_3$ .

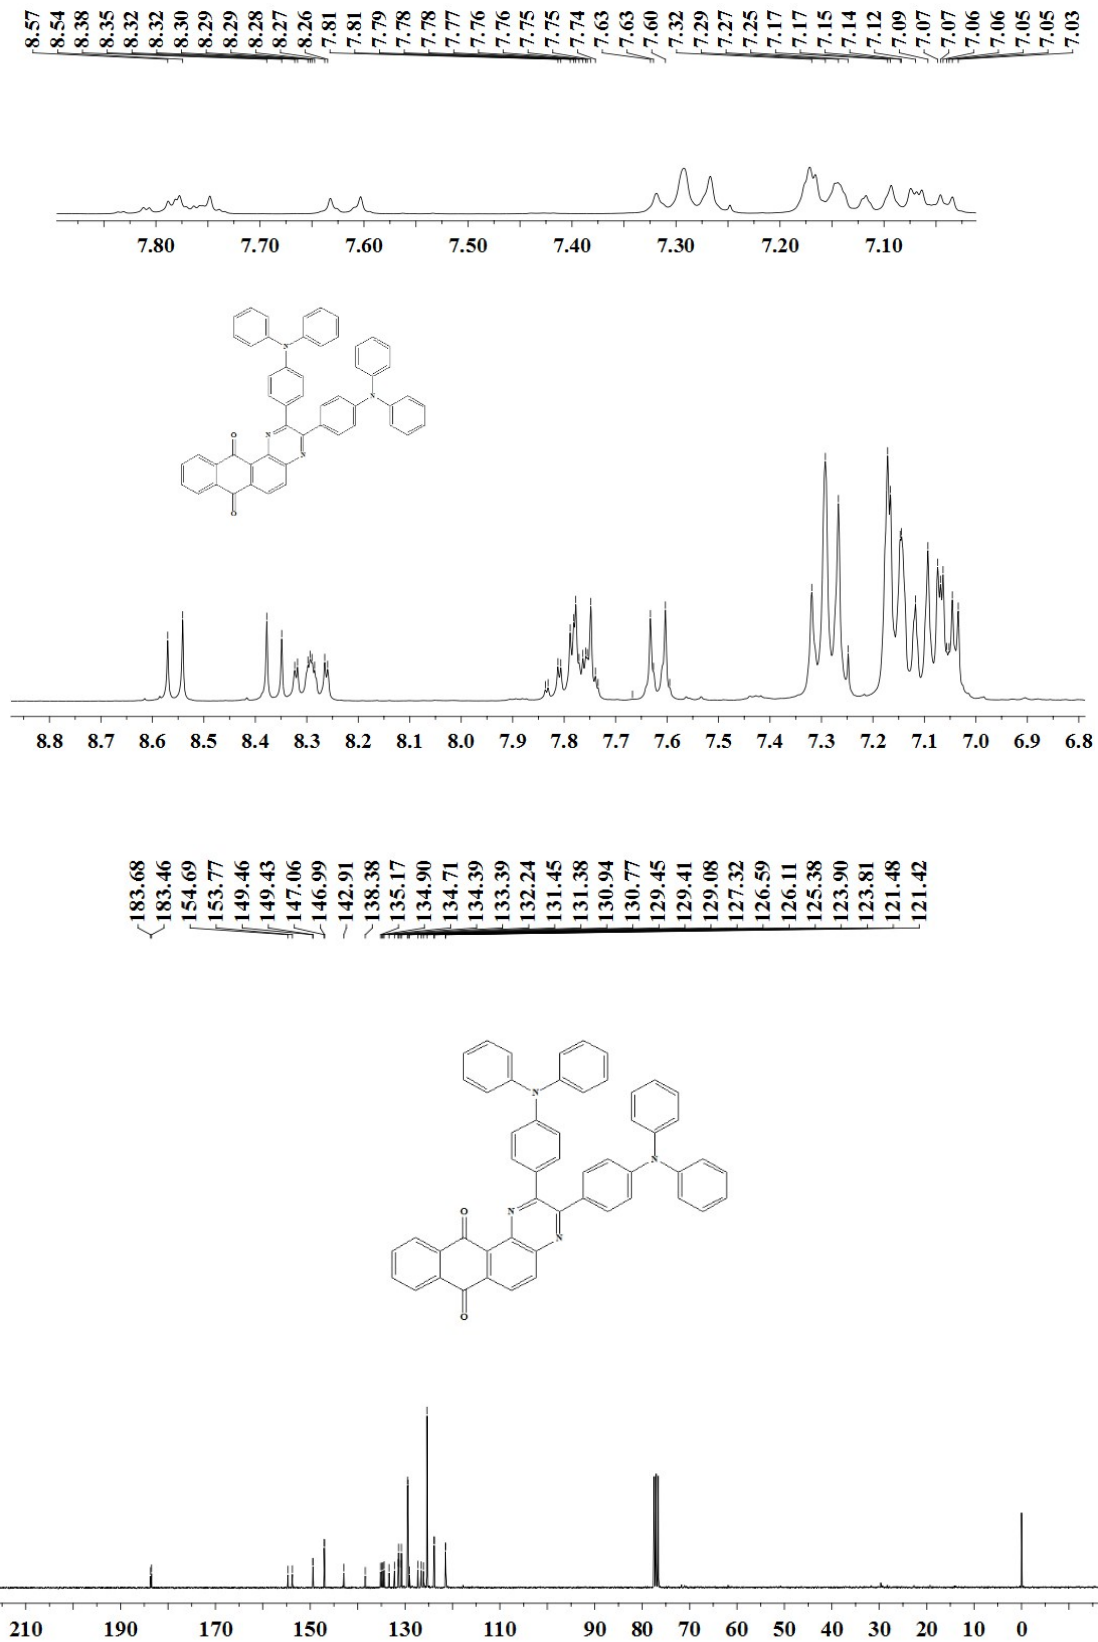

Figure S15: <sup>1</sup>H-NMR and <sup>13</sup>C-NMR spectra of compound 2 in CDCl<sub>3</sub>.

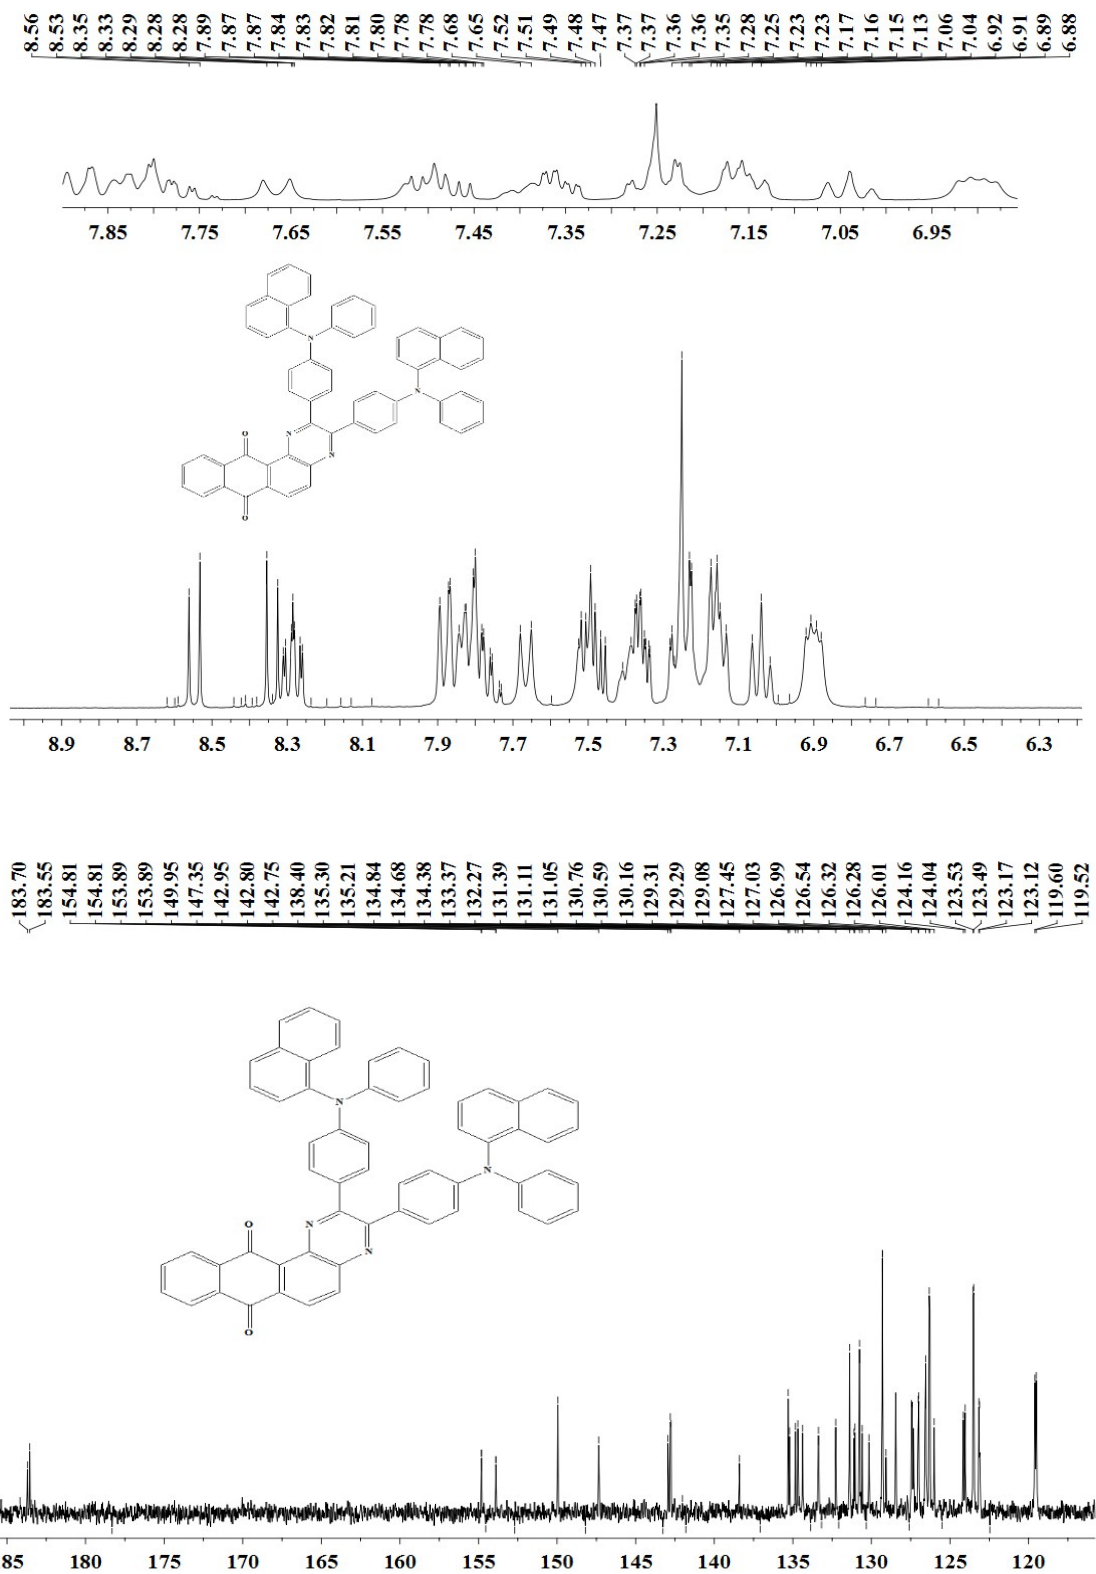

Figure S16: <sup>1</sup>H-NMR and <sup>13</sup>C-NMR spectra of compound 3 in CDCl<sub>3</sub>.



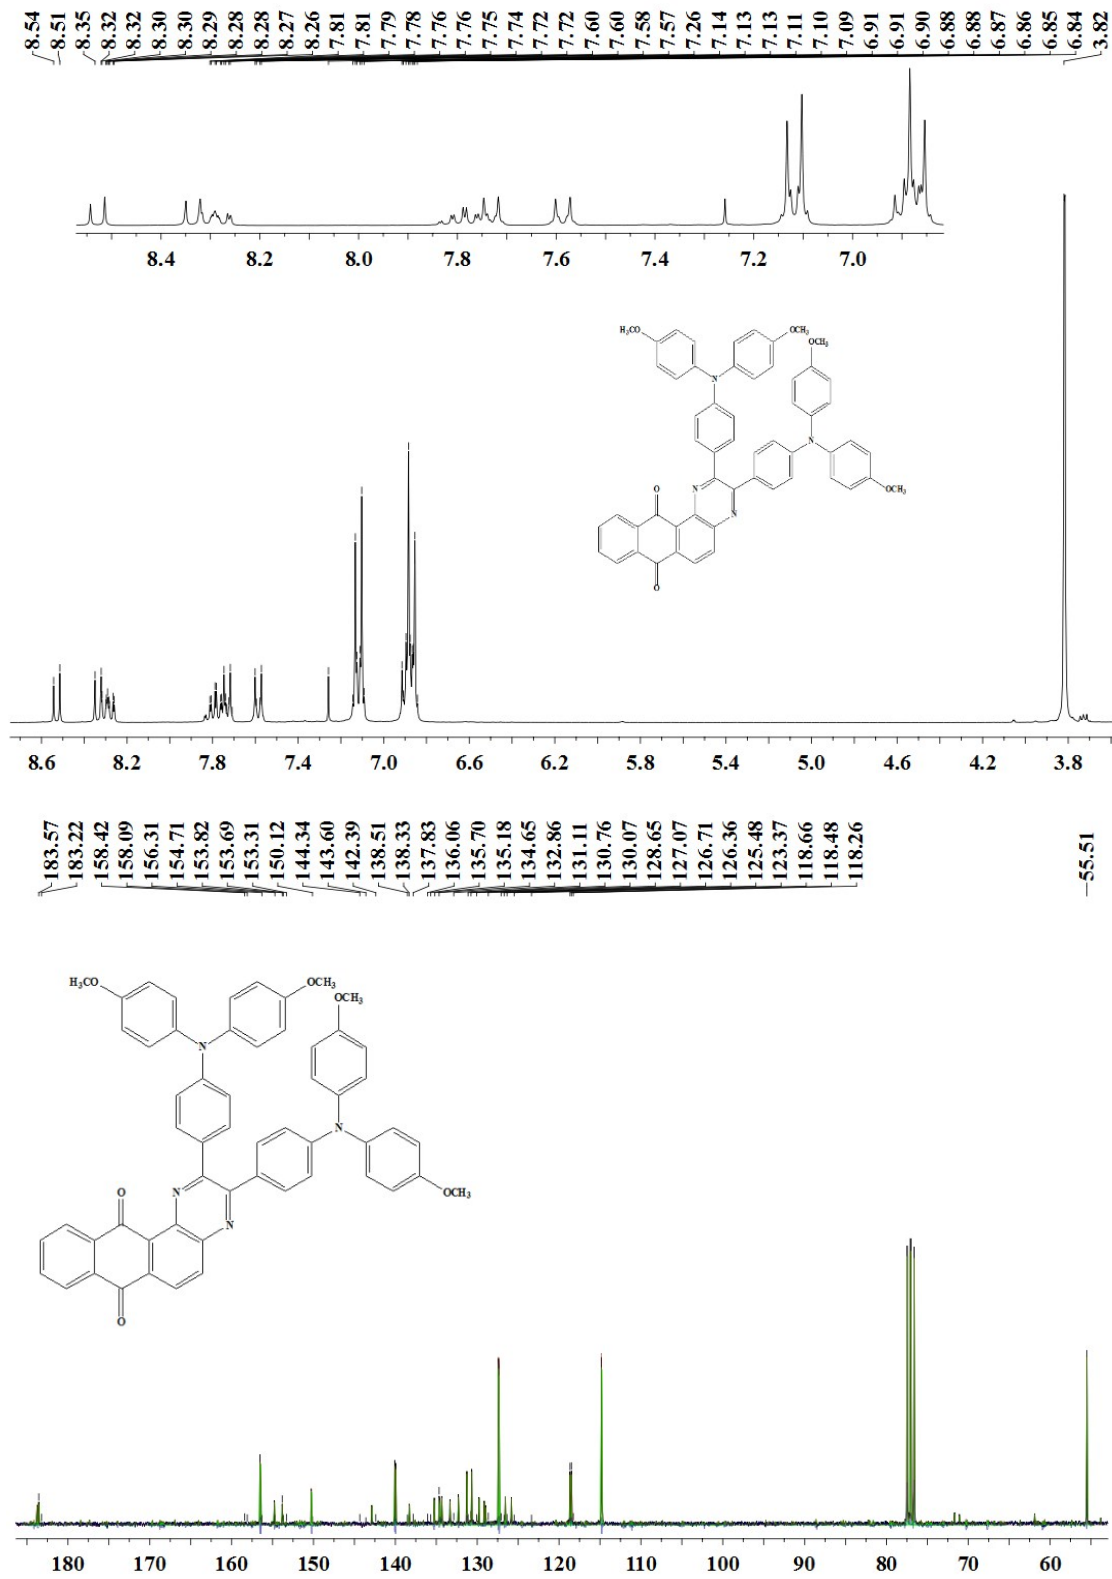

Figure S17:  $^1\text{H-NMR}$  and  $^{13}\text{C-NMR}$  spectra of compound 4 in  $\text{CDCl}_3$ .



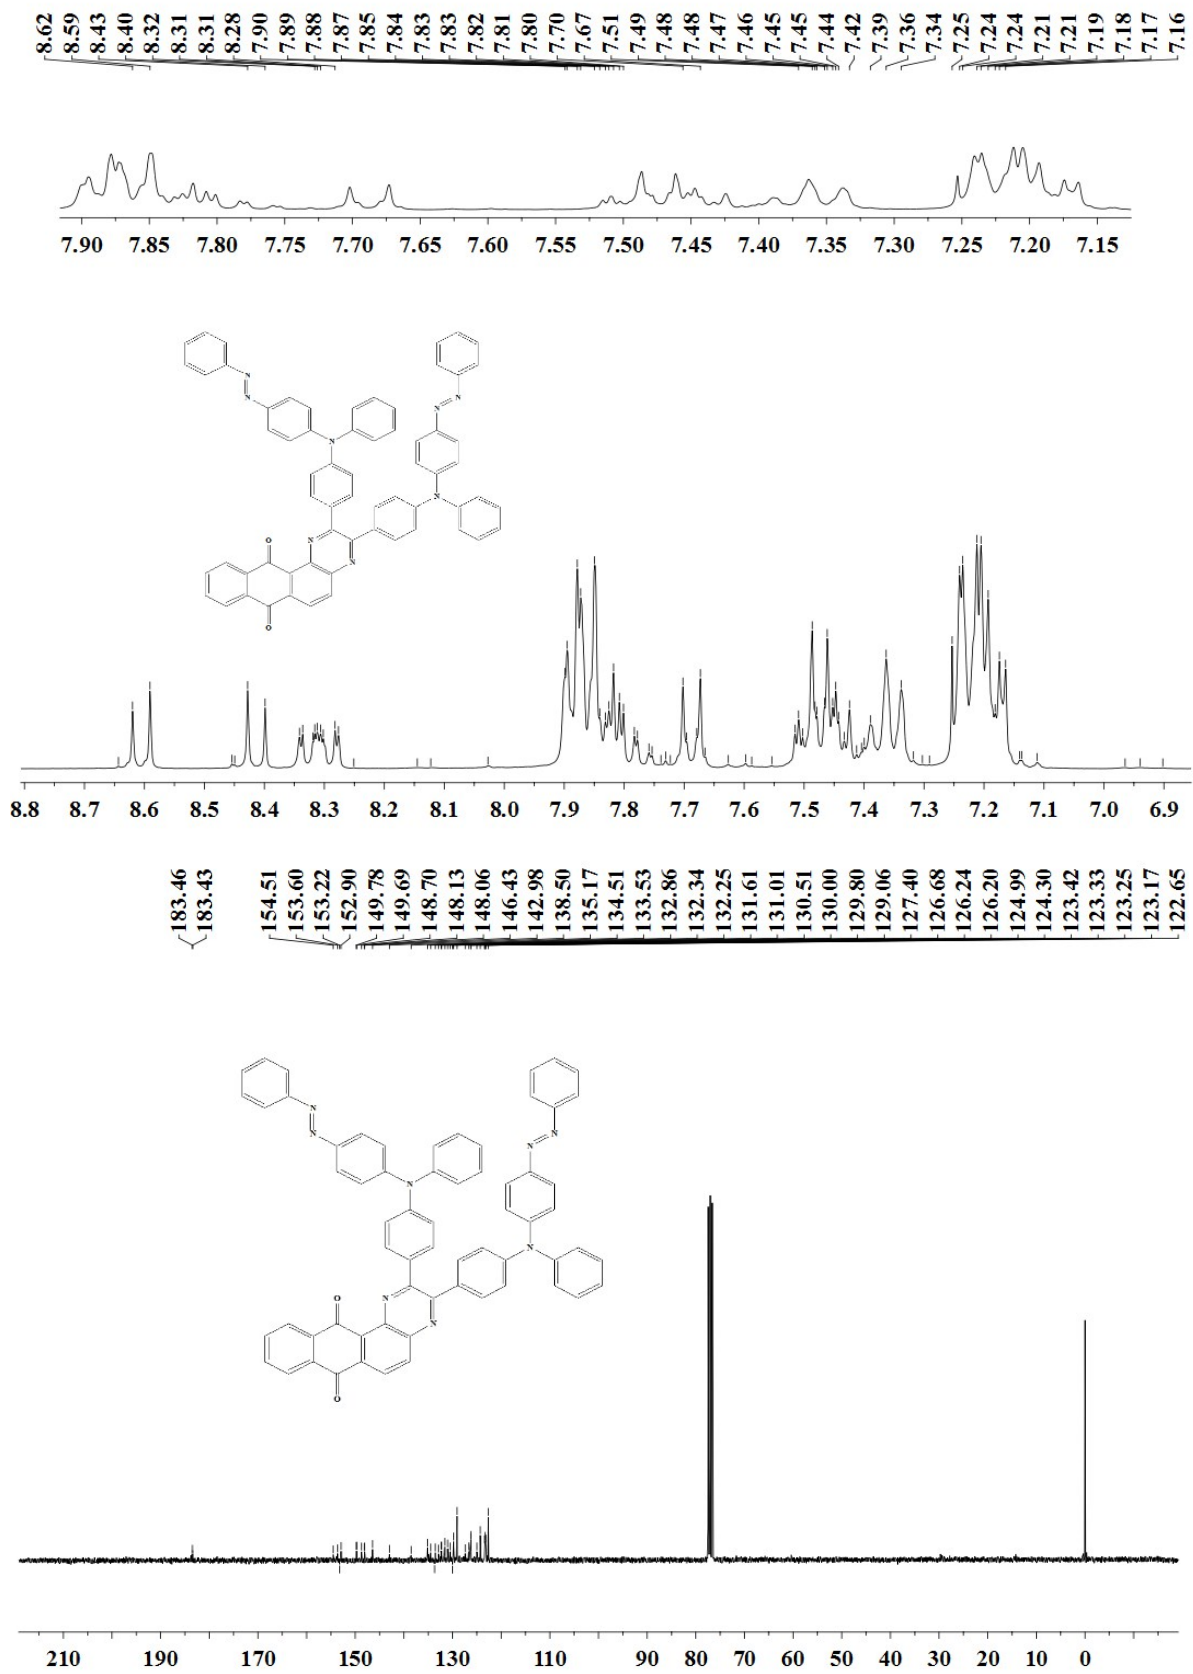

Figure S19: <sup>1</sup>H-NMR and <sup>13</sup>C-NMR spectra of compound 6 in CDCl<sub>3</sub>.

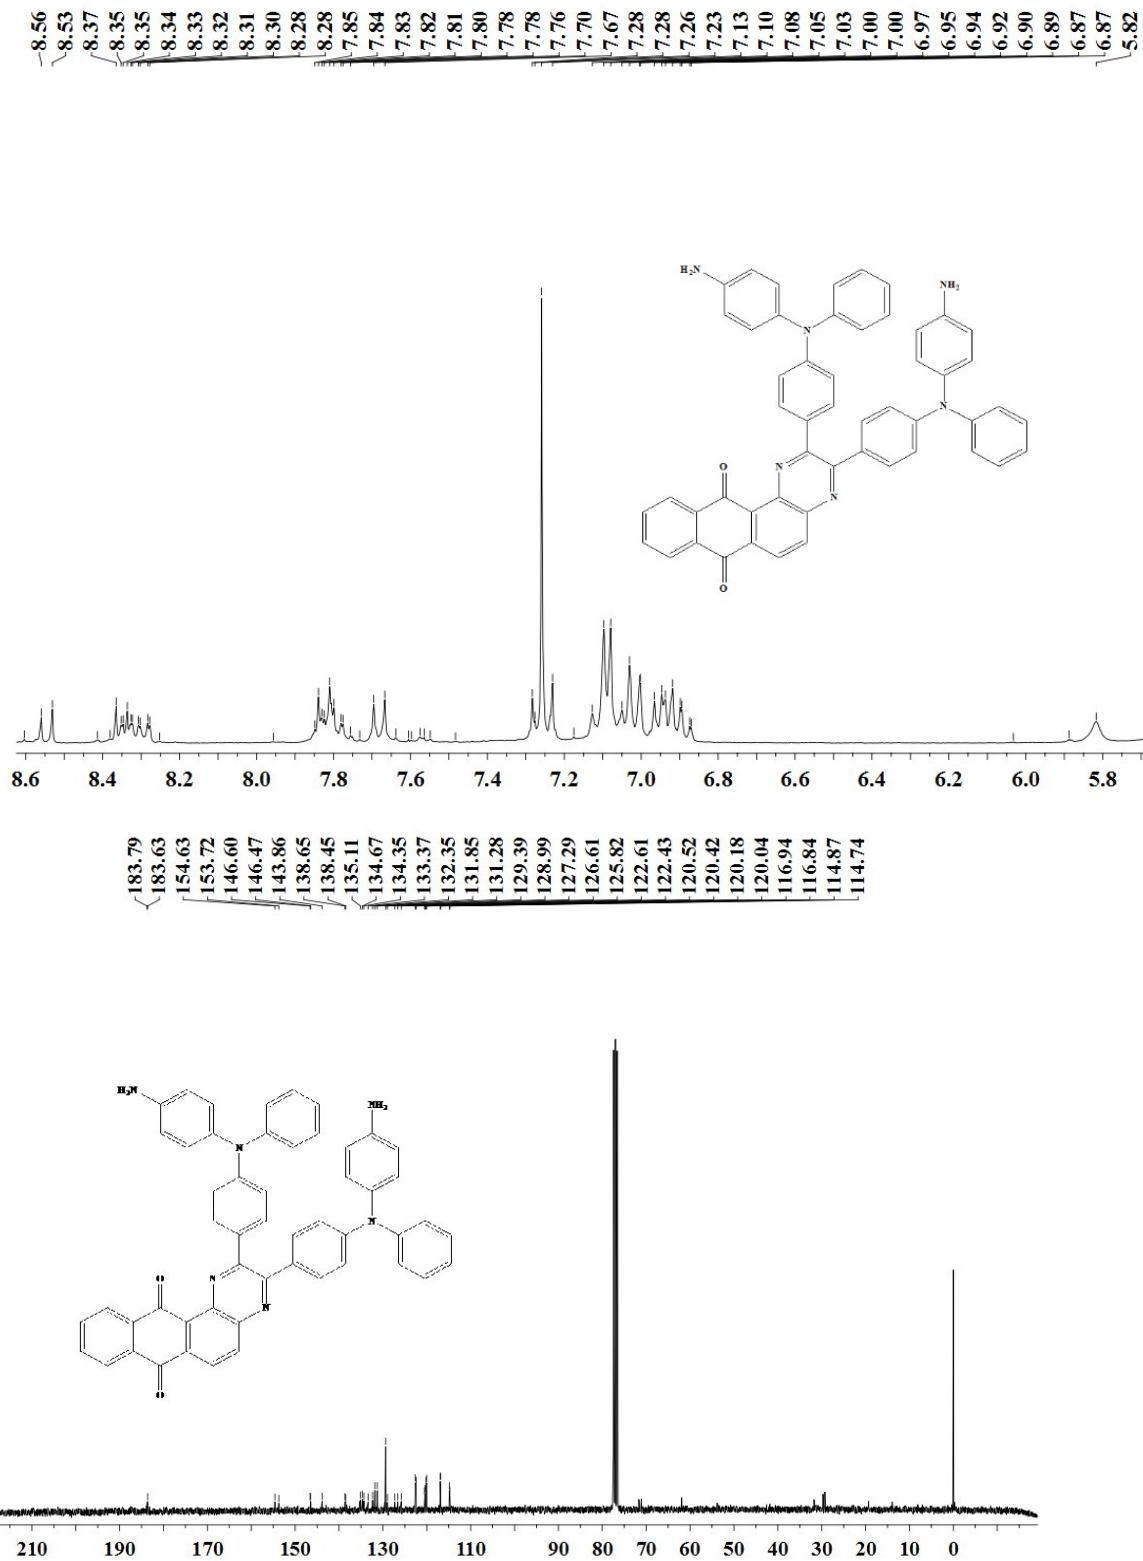

Figure S20: <sup>1</sup>H-NMR and <sup>13</sup>C-NMR spectra of compound 7 in CDCl<sub>3</sub>.

## 5. Photophysical data of compounds 2-7 in various solvents:

i) Photophysical data of compounds 2-7 in Dichloromethane.

| Compound | $\lambda_{\text{abs}}$ , nm <sup>a</sup><br>(log $\epsilon_{\text{max}}$ M <sup>-1</sup> cm <sup>-1</sup> ) | $\lambda_{\text{em}}$ <sup>a</sup><br>nm | Stokes<br>shift<br>cm <sup>-1</sup> | $\phi_{\text{F}}$ |
|----------|-------------------------------------------------------------------------------------------------------------|------------------------------------------|-------------------------------------|-------------------|
| 2        | 262 (4.80), 350 (4.63),<br>518(4.22)                                                                        | 416, 436                                 | 15232                               | 0.100             |
| 3        | 263 (4.84), 350 (4.62),<br>519(4.12)                                                                        | 415, 434                                 | 14981                               | 0.030             |
| 4        | 266 (4.63), 350 (4.42),<br>552(4.03)                                                                        | 417, 437                                 | 14710                               | 0.030             |
| 5        | 260 (5.04), 337 (4.69),<br>407(4.86)                                                                        | 415, 433                                 | 15366                               | 0.006             |
| 6        | 266 (4.64), 423 (4.49)                                                                                      | 415, 433                                 | 14499                               | 0.010             |
| 7        | 263 (4.41), 293 (4.49), 524<br>(3.77)                                                                       | 416, 434                                 | 14981                               | 0.170             |

<sup>a</sup>Recorded in 10<sup>-5</sup> M dichloromethane.

ii) Photophysical data of compounds 2-7 in Chloroform.

| Compound | $\lambda_{\text{abs}}$ , nm <sup>a</sup><br>(log $\epsilon_{\text{max}}$ M <sup>-1</sup> cm <sup>-1</sup> ) | $\lambda_{\text{em}}$ <sup>a</sup><br>nm | Stokes<br>shift<br>cm <sup>-1</sup> | $\phi_{\text{F}}$ |
|----------|-------------------------------------------------------------------------------------------------------------|------------------------------------------|-------------------------------------|-------------------|
| 2        | 263 (4.85), 350(4.67), 535(4.27)                                                                            | 416, 435                                 | 15034                               | 0.005             |
| 3        | 265 (5.04), 349 (4.83),<br>531(4.41)                                                                        | 416, 438                                 | 14904                               | 0.003             |
| 4        | 266 (4.77), 361 (4.53),<br>561(4.13)                                                                        | 415, 438                                 | 14762                               | 0.127             |
| 5        | 260 (5.08), 339 (4.74),<br>405(4.90)                                                                        | 415, 438                                 | 15630                               | 0.006             |
| 6        | 266 (4.13), 422 (4.29)                                                                                      | 413, 435                                 | 14605                               | 0.090             |
| 7        | 293 (3.90), 545 (2.95)                                                                                      | 415, 435                                 | 11141                               | 0.080             |

<sup>a</sup>Recorded in 10<sup>-5</sup> M in chloroform.

iii) Photophysical data of compounds 2-7 in n-hexane, acetonitrile and methanol.

| Compound | $\lambda_{\text{abs}}^{\text{a}}, \text{nm}$<br>( $\log \epsilon_{\text{max}} \text{M}^{-1} \text{cm}^{-1}$ ) | $\lambda_{\text{em}}^{\text{a}}$<br>nm | $\lambda_{\text{abs}}^{\text{b}}, \text{nm}$<br>( $\log \epsilon_{\text{max}} \text{M}^{-1} \text{cm}^{-1}$ ) | $\lambda_{\text{em}}^{\text{b}}$<br>nm | $\lambda_{\text{abs}}^{\text{c}}, \text{nm}$<br>( $\log \epsilon_{\text{max}} \text{M}^{-1} \text{cm}^{-1}$ ) | $\lambda_{\text{em}}^{\text{c}}$<br>nm |
|----------|---------------------------------------------------------------------------------------------------------------|----------------------------------------|---------------------------------------------------------------------------------------------------------------|----------------------------------------|---------------------------------------------------------------------------------------------------------------|----------------------------------------|
| 2        | 261 (4.45), 342<br>(4.33), 503 (3.98)                                                                         |                                        | 261 (4.83), 340<br>(4.65), 498 (4.23)                                                                         |                                        | 263 (4.19), 350<br>(4.02), 508 (3.60)                                                                         |                                        |
| 3        | 261 (5.04), 341<br>(4.88), 504 (4.50)                                                                         |                                        | 261 (5.08), 339<br>(4.88), 497 (4.43)                                                                         |                                        | 261 (4.85), 341<br>(4.66), 507 (4.21)                                                                         |                                        |
| 4        | 279 (4.89), 350<br>(4.76), 532(4.43)                                                                          |                                        | 264 (5.18) 347<br>(4.97), 523 (4.57)                                                                          |                                        | 265(4.89), 350<br>(4.67), 538 (4.28)                                                                          |                                        |
| 5        | 256 (4.12), 381<br>(4.09), 458 (3.70)                                                                         |                                        | 259 (4.87), 335<br>(4.47), 404 (4.67)                                                                         |                                        | 258 (5.03), 405<br>(4.84),                                                                                    |                                        |
| 6        | 262(4.62), 417<br>(4.48)                                                                                      |                                        | 261 (4.55),<br>343(4.22), 425<br>(4.25)                                                                       |                                        | 264 (4.51), 415<br>(4.30)                                                                                     |                                        |
| 7        | 261 (4.78), 334<br>(4.66), 528 (4.32)                                                                         | 415,<br>435                            | 291 (4.79), 520<br>(4.14)                                                                                     |                                        | 254 (4.46), 295<br>(4.60), 542 (3.92)                                                                         |                                        |

<sup>a</sup>Recorded in  $10^{-5}$  M n-hexane, <sup>b</sup>Recorded in  $10^{-5}$  M acetonitrile and <sup>c</sup>Recorded in  $10^{-5}$  M methanol.

6. Absorption spectra of compound **1** in toluene.

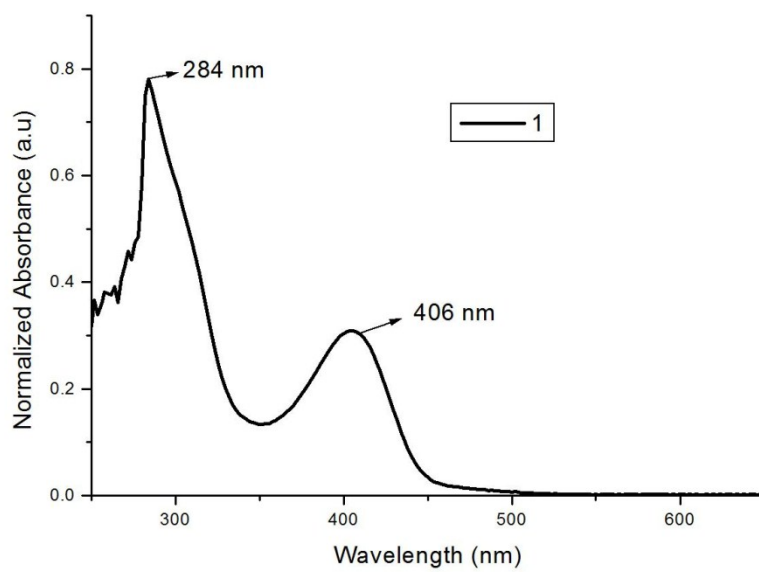

7. Absorption and Emission spectra of compounds 2-7 in various solvents:

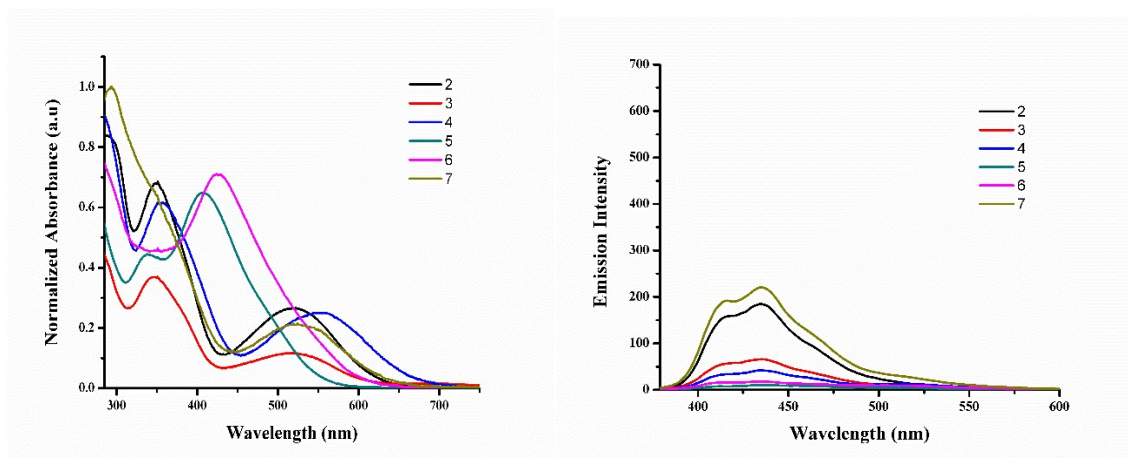

(a)

(b)

Figure S21: Absorption spectra (a) and Emission spectra (excited at  $\lambda=350$  nm) (b) of 2-7 in dichloromethane.

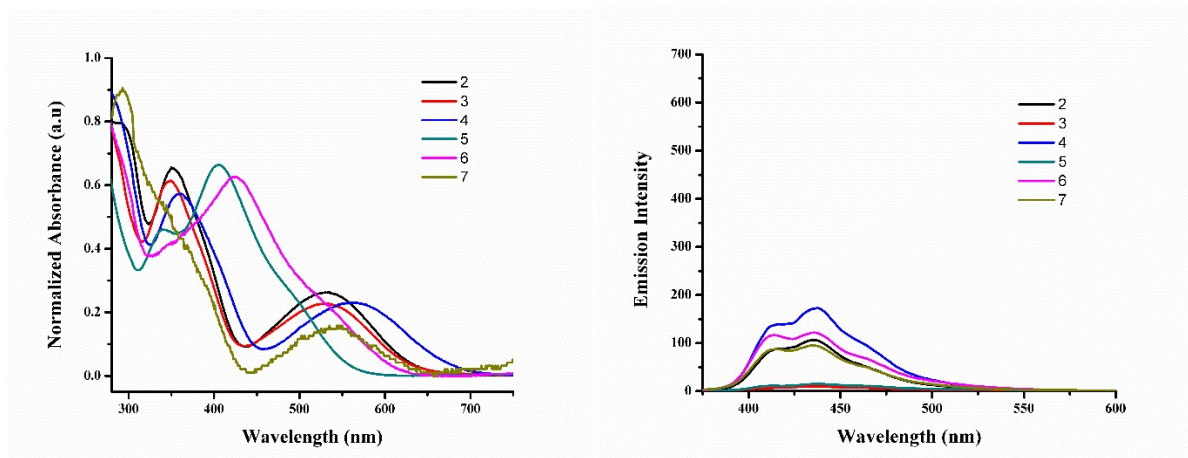

(a)

(b)

Figure S22: Absorption spectra (a) and Emission spectra (excited at  $\lambda=350$  nm) (b) of 2-7 in chloroform.



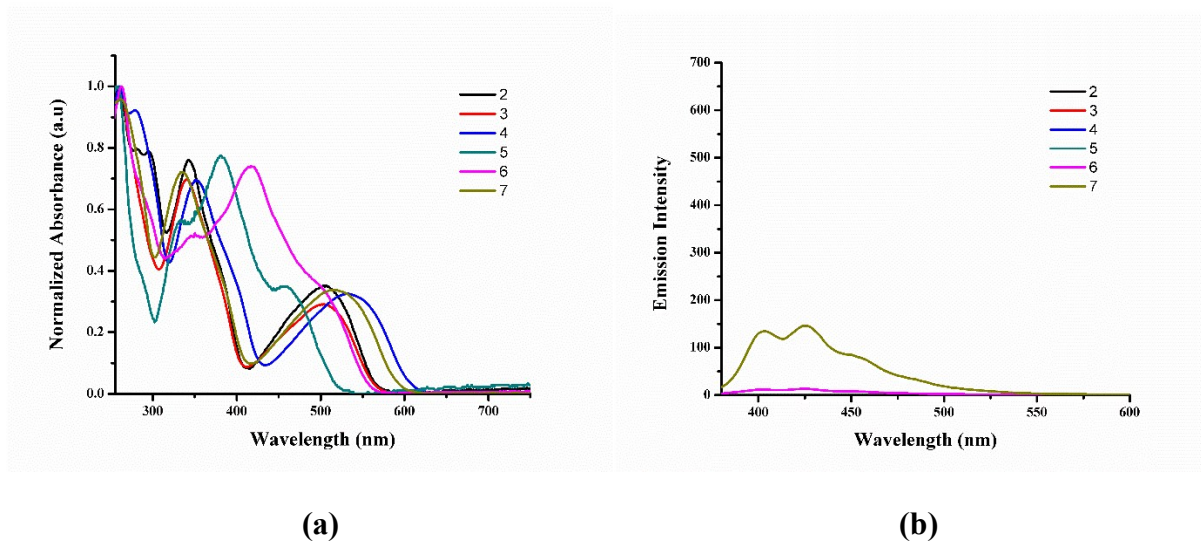

**Figure S23:** Absorption spectra (a) and Emission spectra (excited at  $\lambda=350$  nm) (b) of 2-7 in n-hexane.

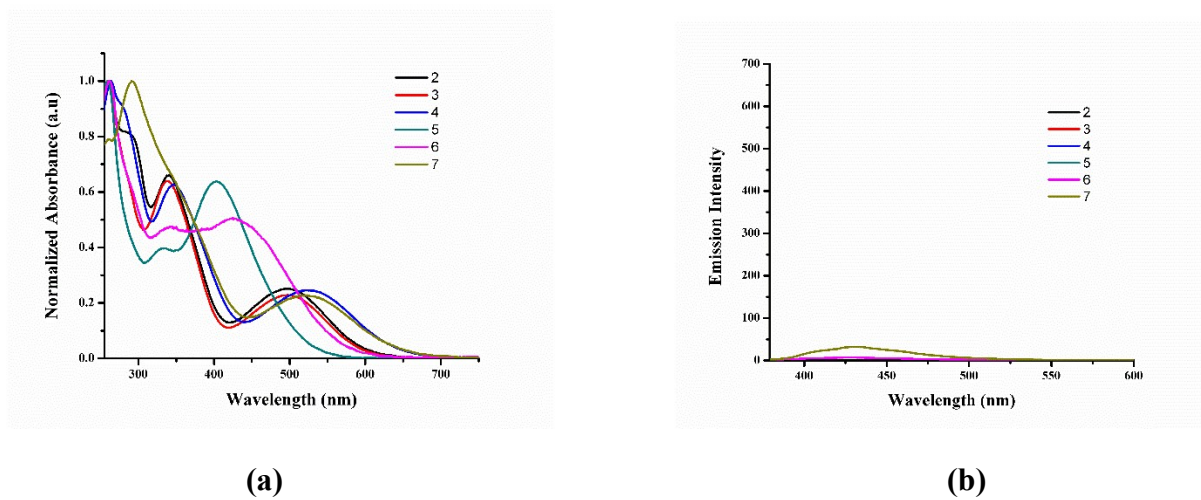

**Figure S24:** Absorption spectra (a) and Emission spectra (excited at  $\lambda=350$  nm) (b) of 2-7 in acetonitrile.

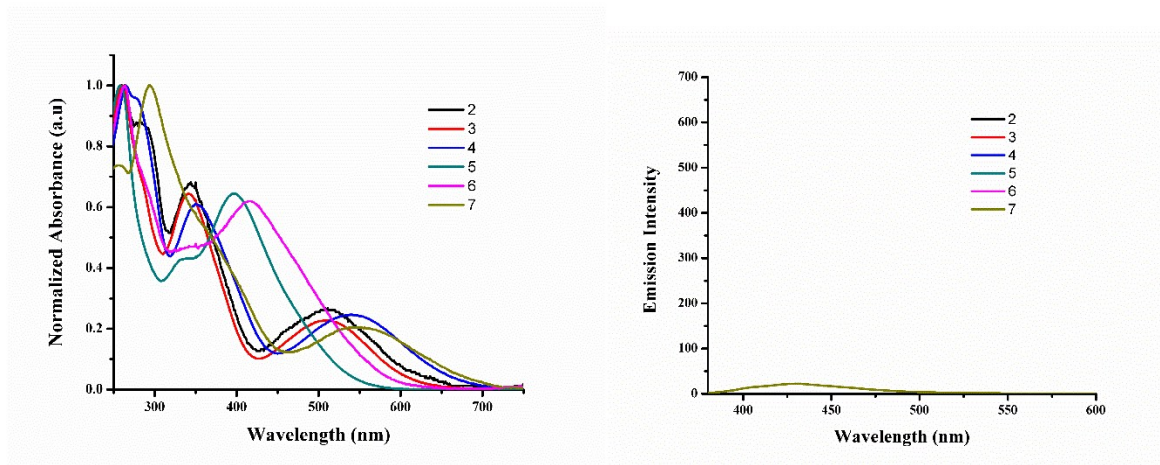

(a)

(b)

**Figure S25:** Absorption spectra (a) and Emission spectra (excited at  $\lambda=350$  nm) (b) of **2-7** in methanol.

**8. Cyclic voltammetry (CV) and Differential Pulse Voltammetry (DPV) of compounds 1-7 in anhydrous dichloromethane.**

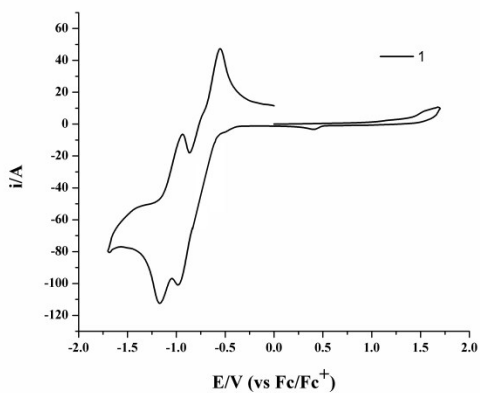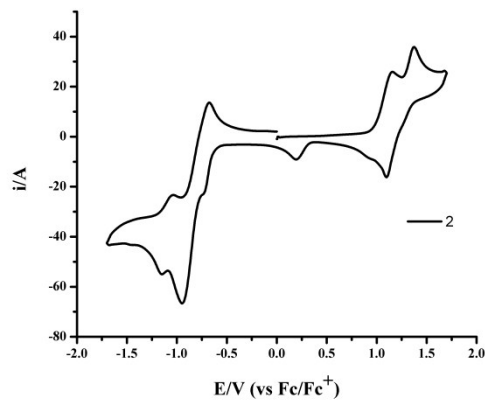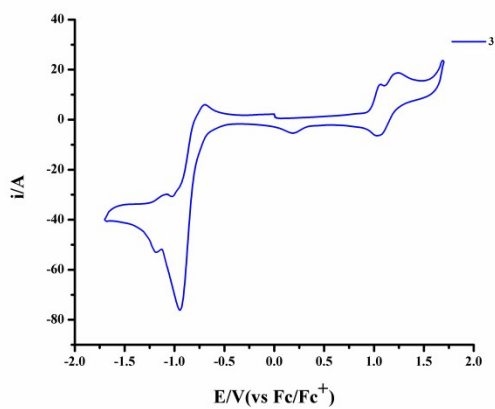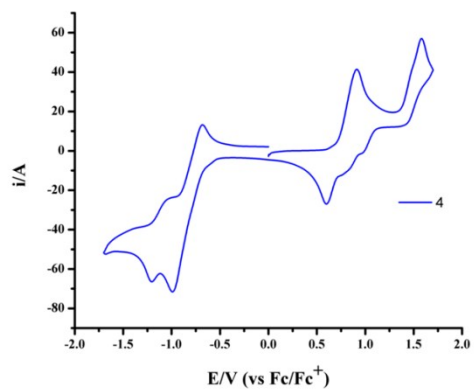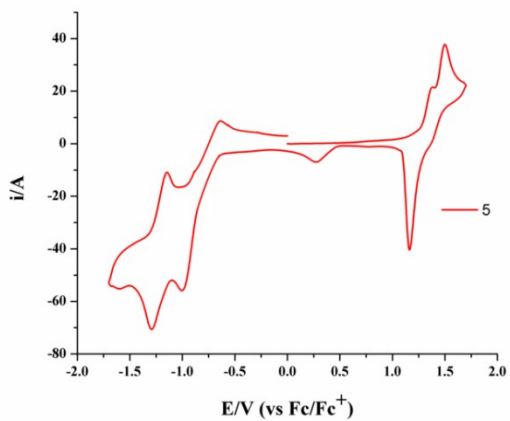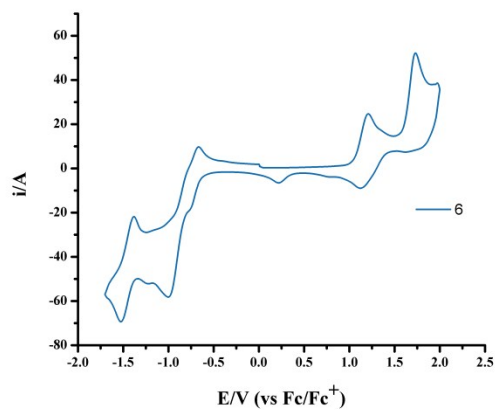

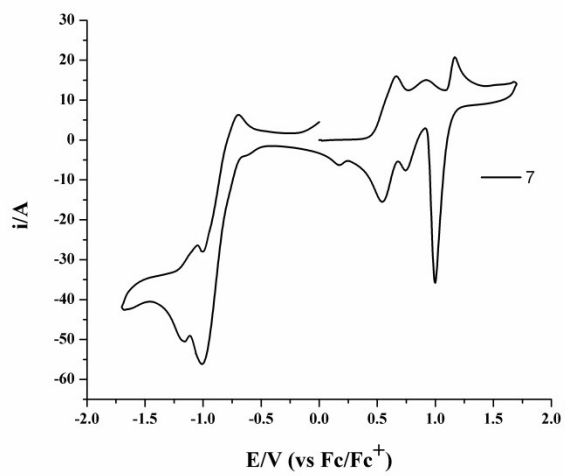

**Figure S26:** Full scan of compounds **1** **7** in anhydrous dichloromethane with scan rate 100mV<sup>-1</sup>.

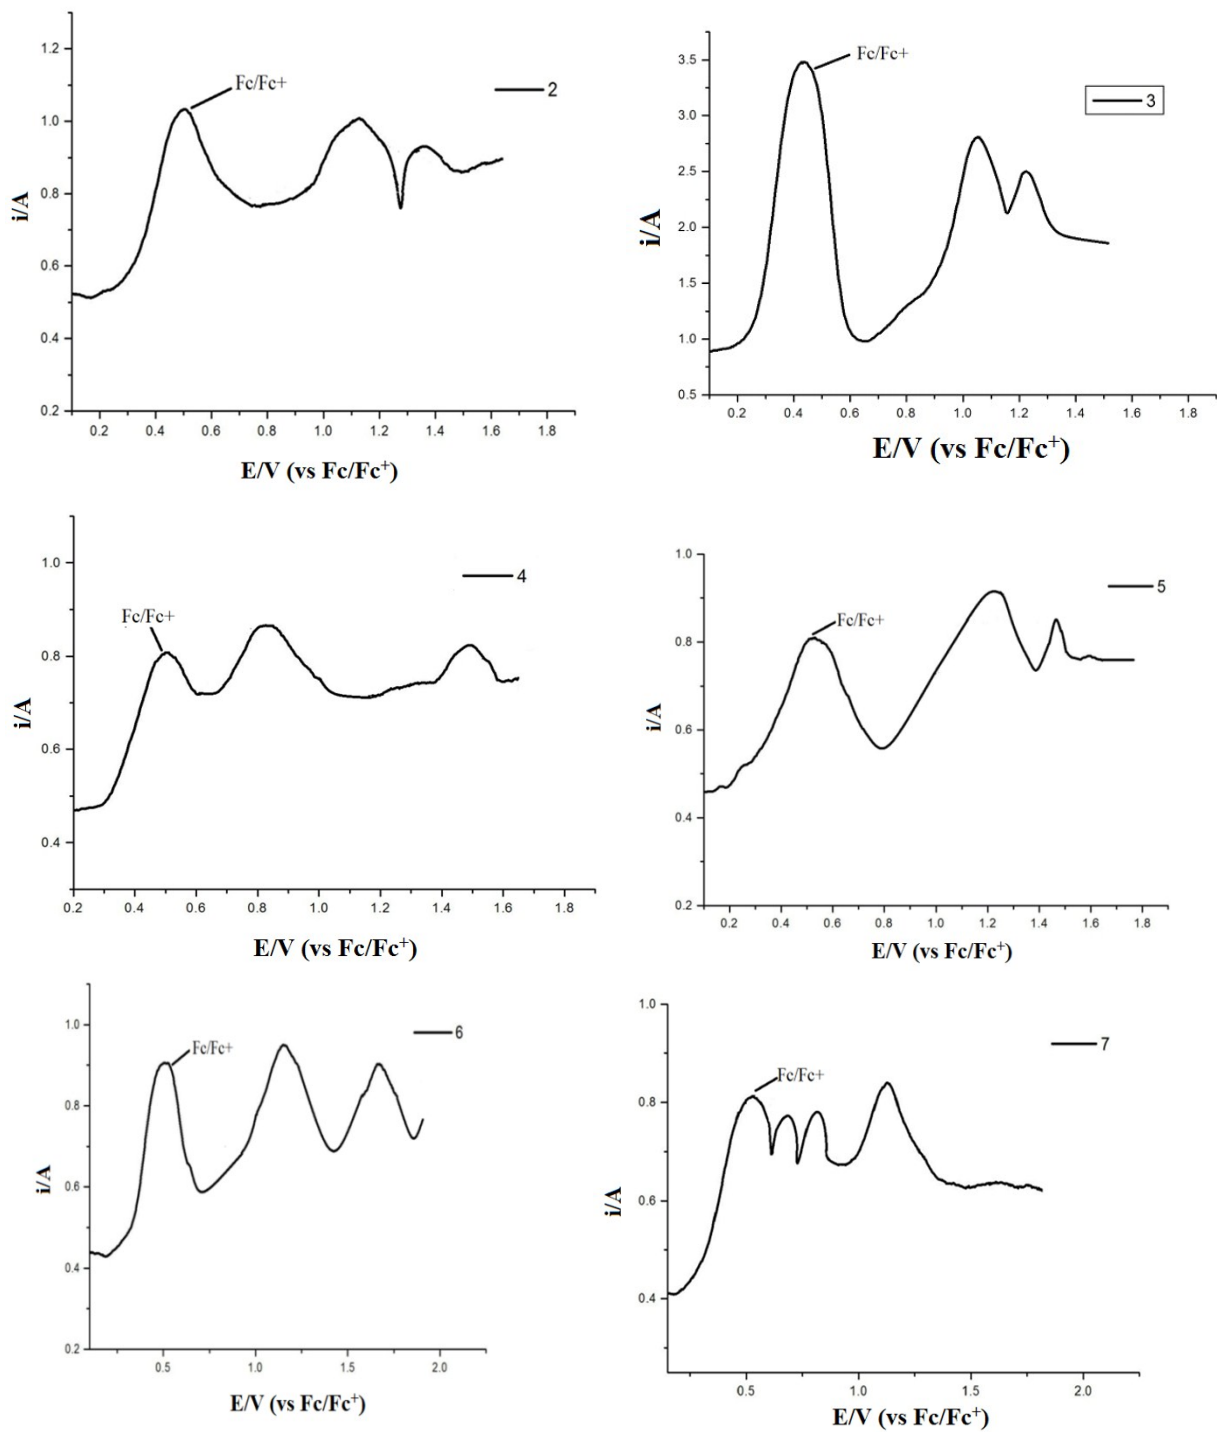

**Figure S27:** DPV plots (anodic sweep) of compounds 2–7.

9. Optimized structure of compounds 2-7 based on DFT (B3LYP/6-311G) calculations.

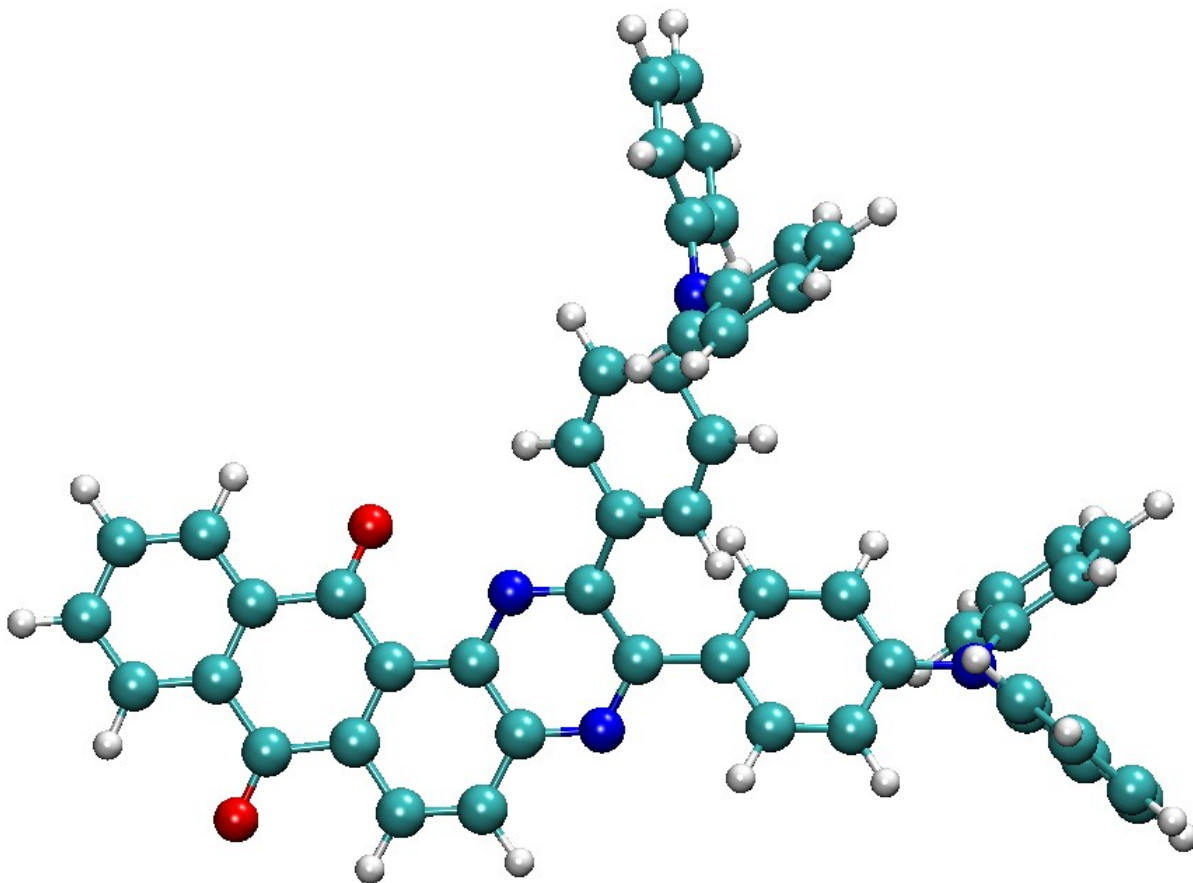

Figure S28: Optimized structure of compound 2

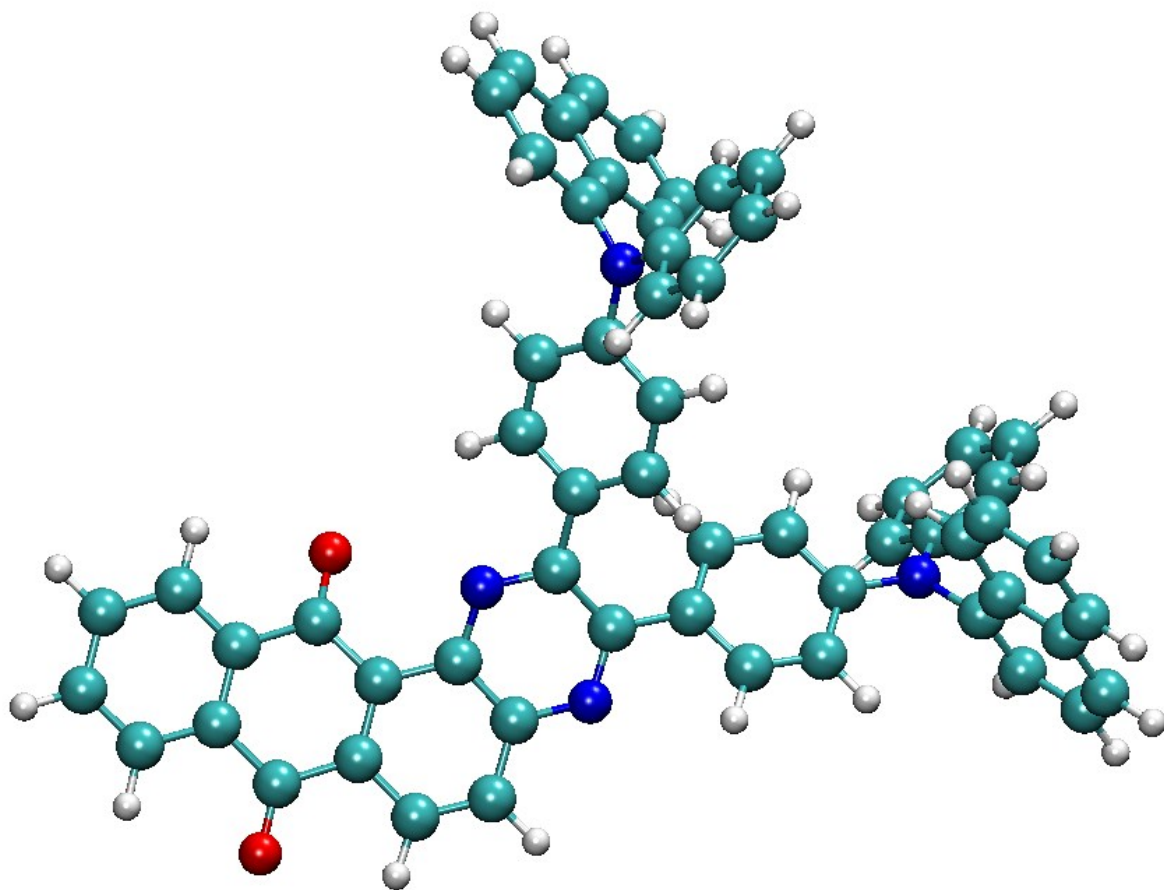

**Figure S29:** Optimized structure of compound 3

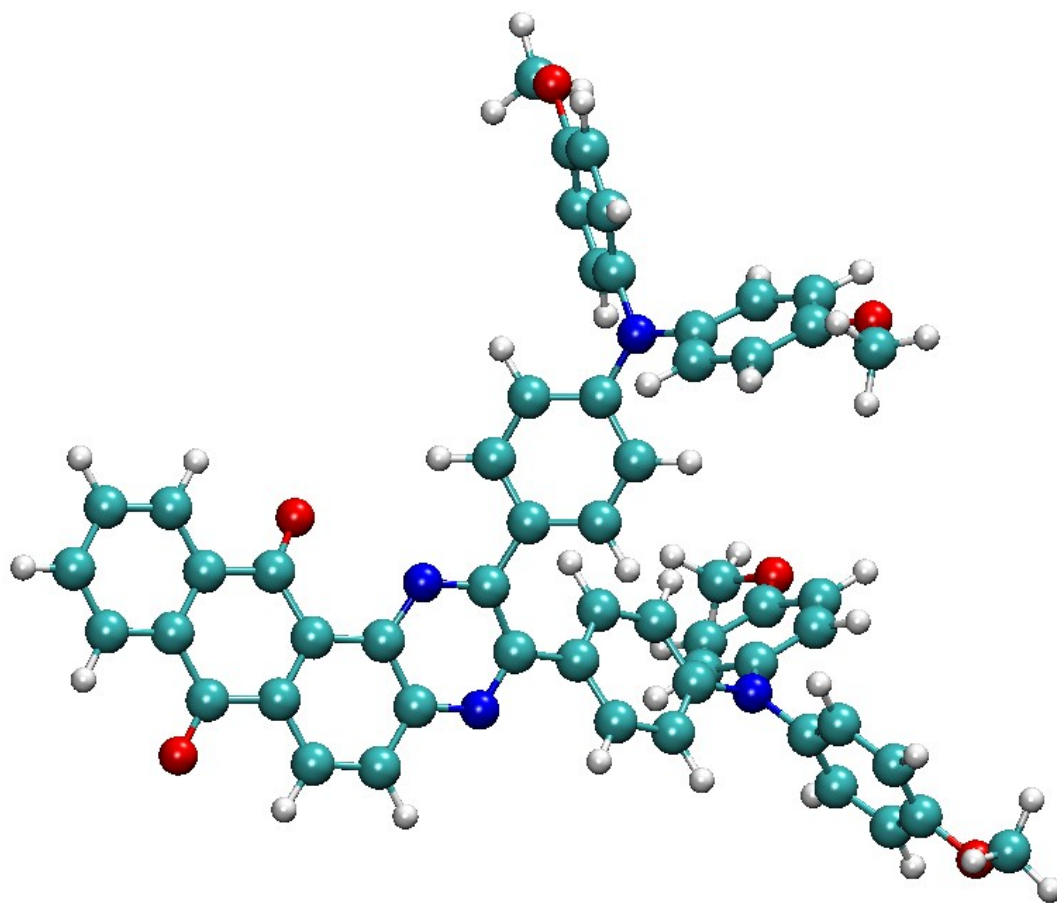

**Figure S30:** Optimized structure of compound 4



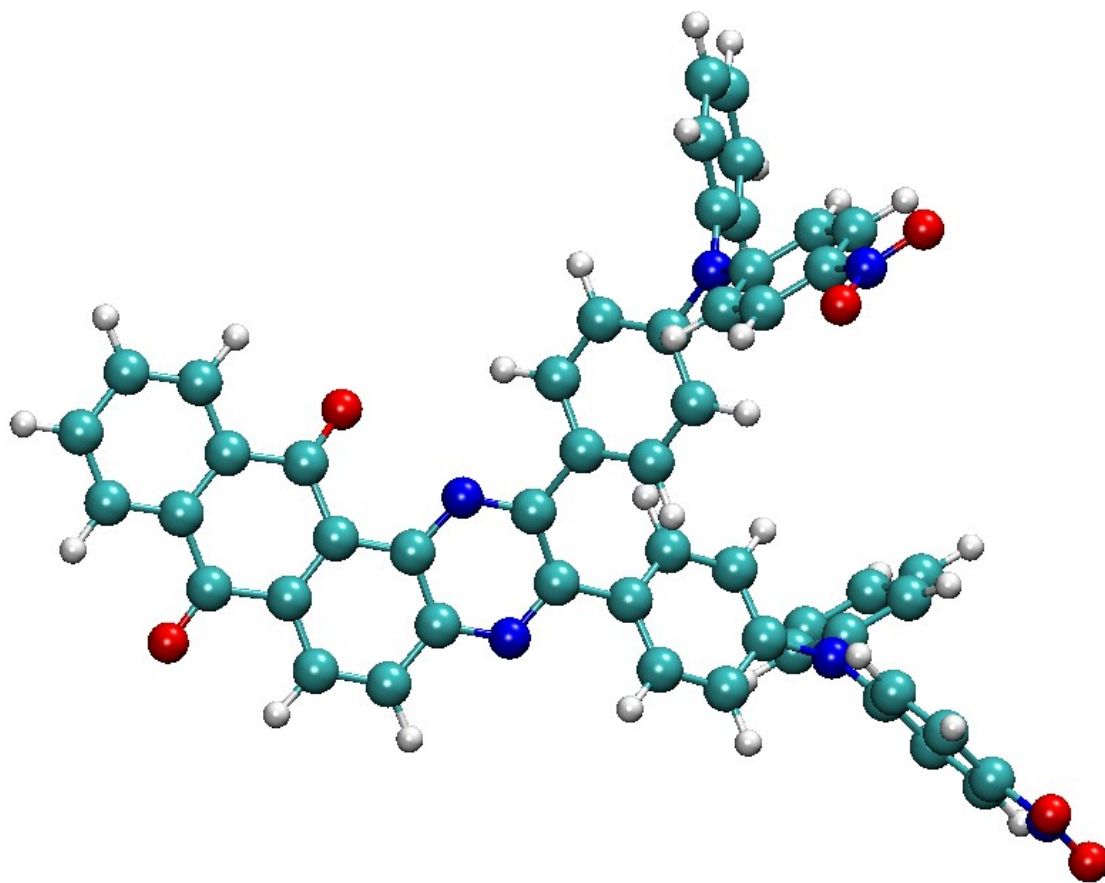

**Figure S31:** Optimized structure of compound **5**

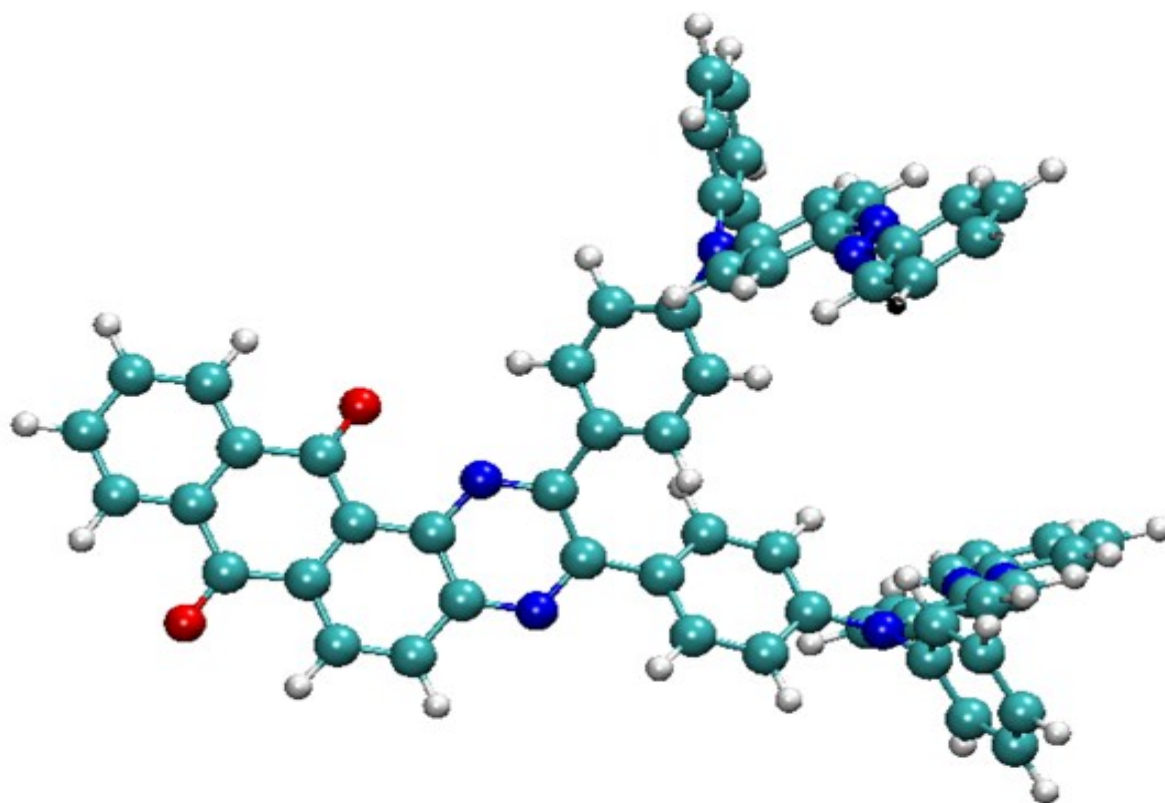

**Figure S32:** Optimized structure of compound 6

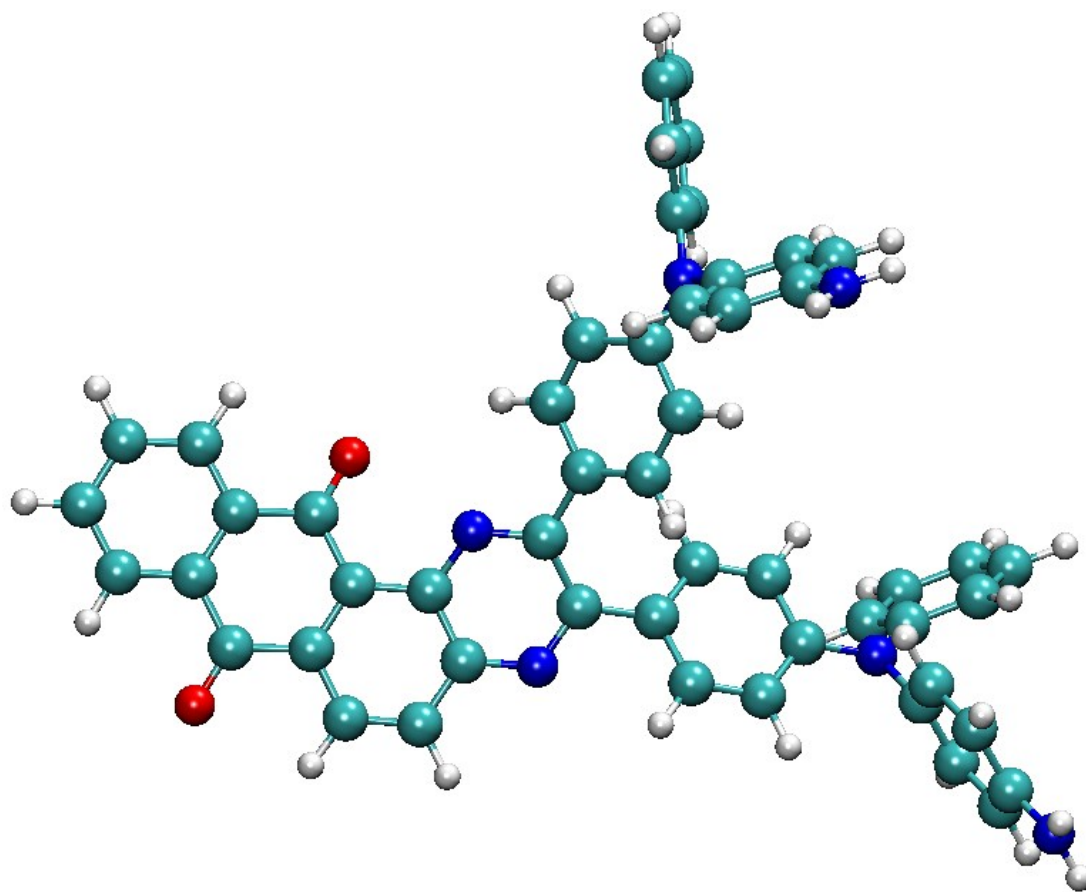

**Figure S33:** Optimized structure of compound 7

10. Frontier molecular orbital of compounds 4 7 based on DFT (B3LYP/6-311G) calculations.

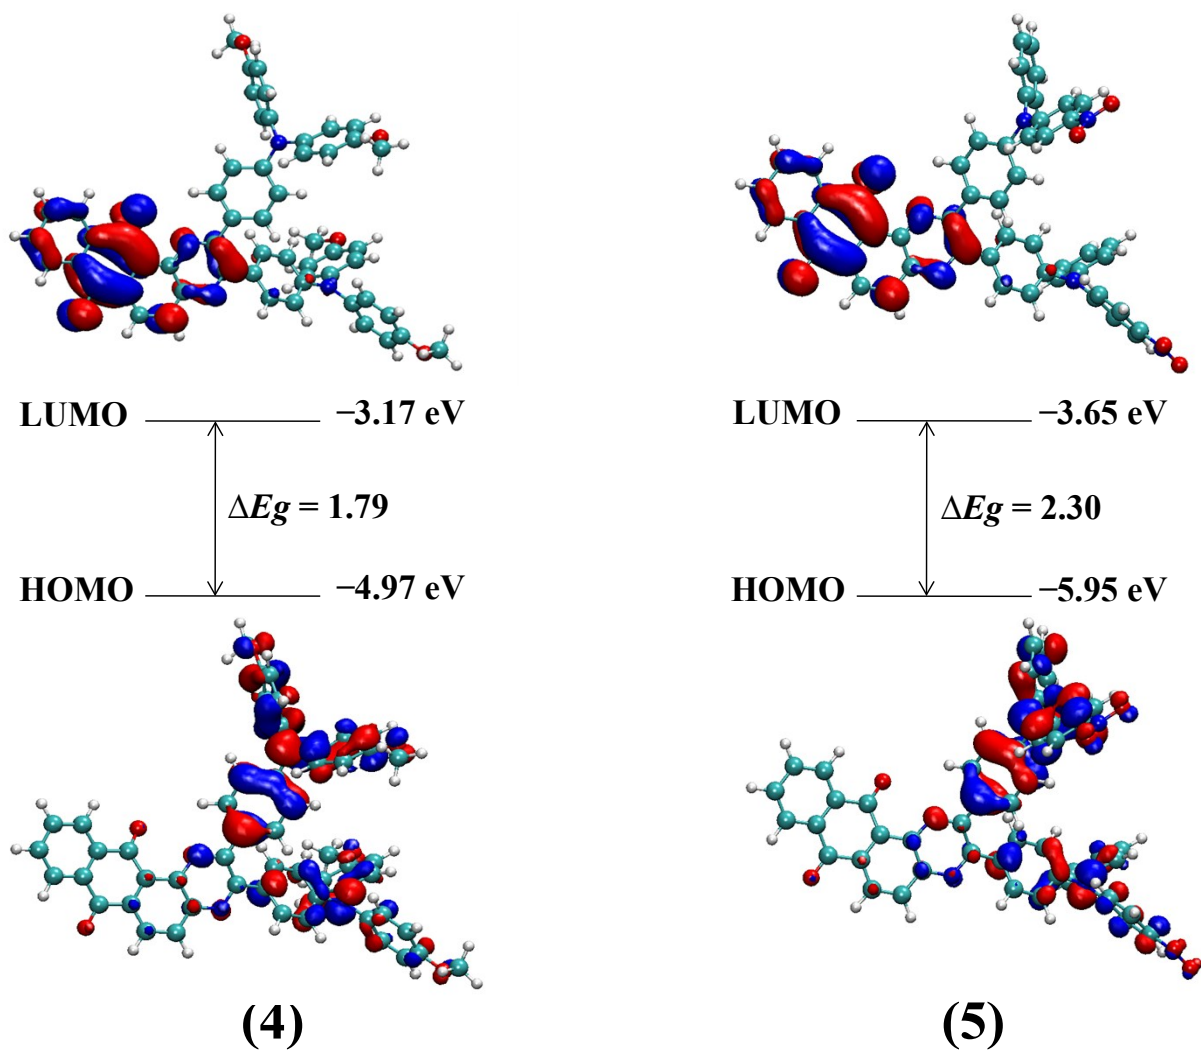

Figure S34: Frontier molecular orbital of compounds 4 and 5

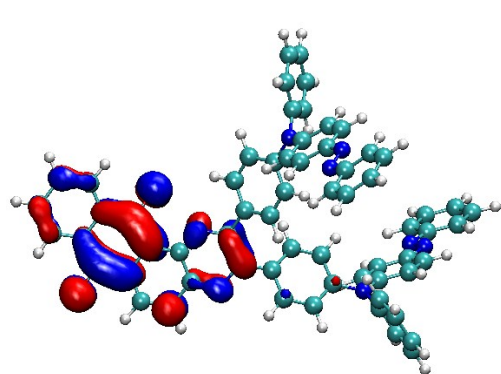

LUMO ———— -3.40 eV  
↑  
 $\Delta E_g = 1.99$   
↓  
HOMO ———— -5.39 eV

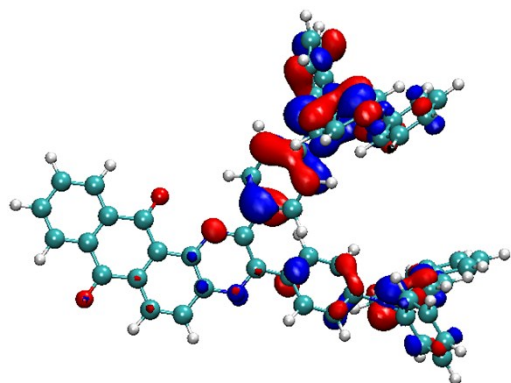

**(6)**

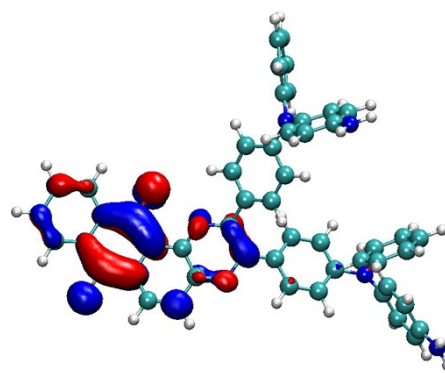

LUMO ———— -3.11  
↑  
 $\Delta E_g = 1.74$   
↓  
HOMO ———— -4.85 eV

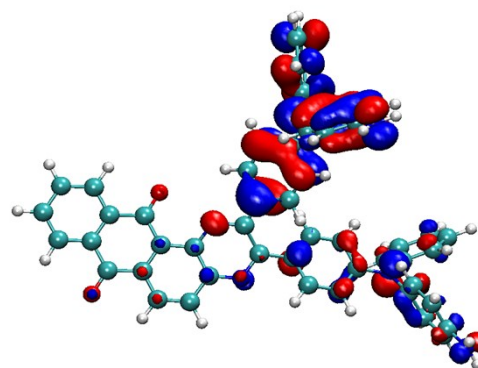

**(7)**

**Figure S35:** Frontier molecular orbital of compounds 6 and 7

**11. Differential Scanning Calorimetry (DSC) and Derivative weight loss plot of compounds 2-7.**

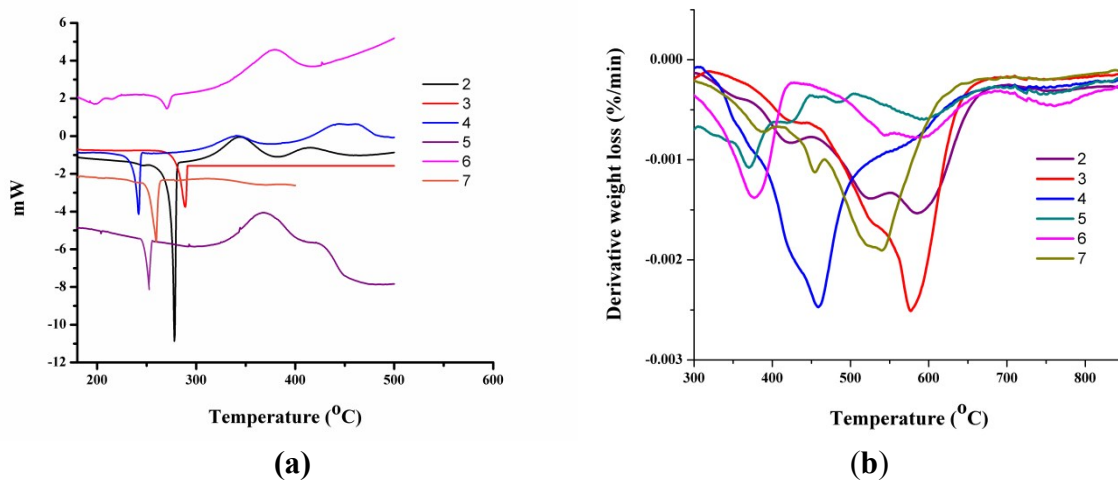

**Figure S36:** Differential scanning calorimetry (DSC) (a) Derivative weight loss (b) plot of compounds 2-7.

## 12. Glass transition temperature plots of compounds 4-6.

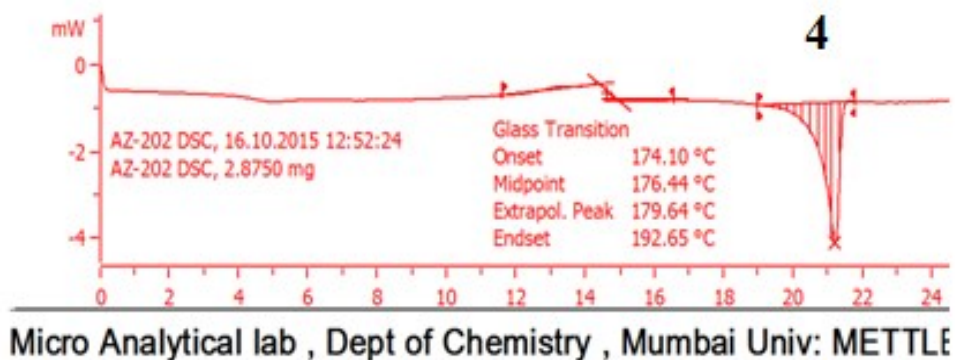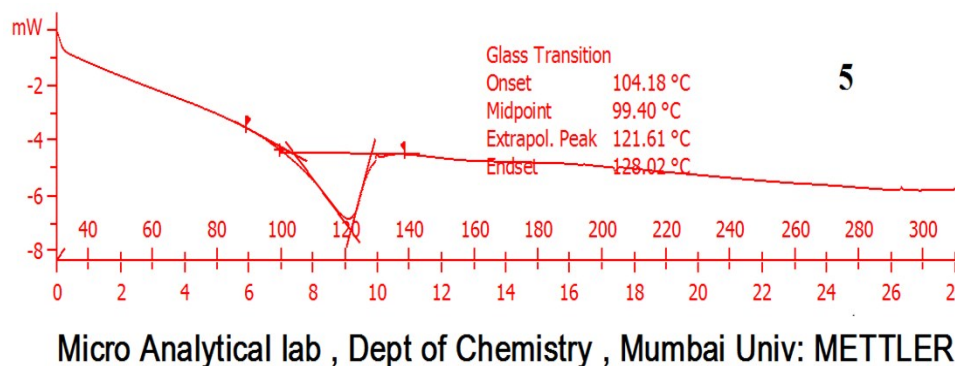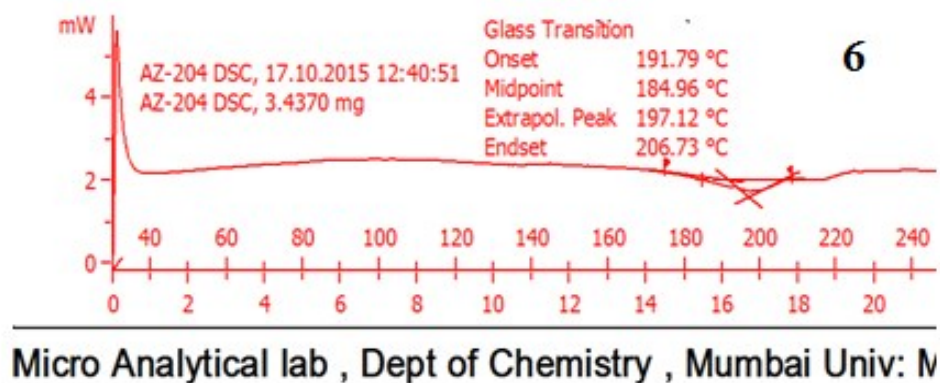

**Figure: S37** Glass Transition Temperature of compounds **4**, **5** and **6**.

### 13. Cartesian coordinates of compounds 2-7.

#### a) Table S1. Cartesian coordinates for the optimized structure of compound 2.

Total energy: 2371.39951081 Hartrees

| Atom | x                 | y                 | z                 |
|------|-------------------|-------------------|-------------------|
| C    | -0.27095464032447 | 5.34346079630652  | 7.57303512047607  |
| C    | -1.55790264032447 | 5.70894379630652  | 7.98958512047607  |
| C    | -2.66331764032446 | 5.37423879630652  | 7.21120812047607  |
| C    | -2.49134464032447 | 4.66358279630652  | 6.01541312047607  |
| C    | -1.19869964032447 | 4.29516579630652  | 5.59560312047607  |
| C    | -0.09186364032447 | 4.64682579630652  | 6.37913412047607  |
| C    | -3.66830264032447 | 4.31216779630652  | 5.19347612047607  |
| C    | -3.45791464032447 | 3.47666979630652  | 3.98190912047607  |
| C    | -2.17664464032447 | 3.06198479630652  | 3.59040712047607  |
| C    | -0.97985264032447 | 3.57793779630653  | 4.30639912047607  |
| C    | -4.61110764032447 | 3.09226479630652  | 3.24888312047607  |
| C    | -4.50217064032447 | 2.31297279630652  | 2.12212912047607  |
| C    | -3.22958164032447 | 1.85336479630652  | 1.71019812047607  |
| C    | -2.06828664032447 | 2.16629079630652  | 2.47923812047607  |
| N    | -3.10510464032447 | 1.15502479630652  | 0.53973612047607  |
| C    | -1.91320264032447 | 0.68019479630652  | 0.16809512047607  |
| C    | -0.80528464032447 | 0.74088379630652  | 1.11026912047607  |
| N    | -0.90022664032447 | 1.52470079630652  | 2.18536112047607  |
| C    | 0.43085535967553  | -0.06449220369348 | 1.02172812047607  |
| C    | -1.81929764032447 | 0.16779979630652  | -1.21383987952393 |
| C    | 0.46272335967553  | -1.35647920369348 | 0.46586112047607  |
| C    | 1.63146735967553  | -2.10900220369348 | 0.46266312047607  |
| C    | 2.81766235967553  | -1.59397520369348 | 1.01920112047607  |
| C    | 2.78746835967553  | -0.30689920369348 | 1.59060912047607  |



|   |                   |                   |                   |
|---|-------------------|-------------------|-------------------|
| C | 1.61426935967553  | 0.43675379630652  | 1.59882512047607  |
| C | -0.65886564032447 | 0.32689479630652  | -1.99422587952393 |
| C | -0.61869564032447 | -0.09379720369348 | -3.31817487952393 |
| C | -1.74363864032447 | -0.69406720369348 | -3.91564287952393 |
| C | -2.91187364032447 | -0.84513720369348 | -3.14297187952393 |
| C | -2.94680064032447 | -0.41423620369348 | -1.82306287952393 |
| N | 4.01628235967553  | -2.35743720369348 | 1.01162612047607  |
| C | 5.28523435967553  | -1.71319920369348 | 0.84389712047607  |
| C | 3.97190135967553  | -3.78093520369348 | 1.17103812047607  |
| N | -1.70362864032447 | -1.13006520369348 | -5.26560287952393 |
| C | -0.93209964032447 | -0.41174320369348 | -6.23751387952393 |
| C | -2.42994464032447 | -2.29479320369348 | -5.67779487952393 |
| O | 0.17937335967553  | 3.46815179630652  | 3.85386412047607  |
| O | -4.82008164032447 | 4.68243279630652  | 5.52114412047607  |
| C | 6.37127835967553  | -2.06406720369348 | 1.66152512047607  |
| C | 7.60992335967553  | -1.44607020369348 | 1.48683612047607  |
| C | 7.77982435967553  | -0.46181620369348 | 0.50860912047607  |
| C | 6.69769335967553  | -0.10649520369348 | -0.30271387952393 |
| C | 5.46037235967553  | -0.73192120369348 | -0.14539587952393 |
| C | 4.74696135967553  | -4.61040020369348 | 0.34418812047607  |
| C | 4.71386735967553  | -5.99546120369348 | 0.51013212047607  |
| C | 3.90045535967553  | -6.57298820369348 | 1.48928812047607  |
| C | 3.12406035967553  | -5.74922920369348 | 2.31006612047607  |
| C | 3.16305035967553  | -4.36248620369348 | 2.16124712047607  |
| C | -0.09666164032447 | -1.10310520369348 | -7.12866387952393 |
| C | 0.64121235967553  | -0.40370020369348 | -8.08437287952393 |
| C | 0.56803235967553  | 0.99038279630652  | -8.15533687952393 |
| C | -0.25914364032447 | 1.68132779630652  | -7.26466187952393 |
| C | -1.01266964032447 | 0.98800879630652  | -6.31657887952393 |

|   |                   |                   |                   |
|---|-------------------|-------------------|-------------------|
| C | -3.18245864032447 | -2.27574020369348 | -6.86281987952393 |
| C | -3.87538864032446 | -3.41548420369348 | -7.27283787952393 |
| C | -3.84034064032446 | -4.58190820369348 | -6.50328687952393 |
| C | -3.09615664032447 | -4.60104320369348 | -5.31993887952393 |
| C | -2.38725864032446 | -3.47092820369348 | -4.91147087952393 |
| H | 0.58742735967553  | 5.60437379630652  | 8.17716212047607  |
| H | -1.69328364032447 | 6.25370379630652  | 8.91386612047607  |
| H | -3.66566364032447 | 5.65152579630652  | 7.50348912047607  |
| H | 0.89166735967553  | 4.36836179630652  | 6.02997812047607  |
| H | -5.56683064032446 | 3.45223679630652  | 3.59909212047607  |
| H | -5.35901864032447 | 2.04560079630652  | 1.52052412047607  |
| H | -0.43141864032447 | -1.78250520369348 | 0.03467512047607  |
| H | 1.63154535967553  | -3.09826220369348 | 0.02911312047607  |
| H | 3.68308835967553  | 0.09772579630652  | 2.03927812047607  |
| H | 1.58373135967553  | 1.40602679630652  | 2.07535212047607  |
| H | 0.22030535967553  | 0.78544679630652  | -1.56558287952393 |
| H | 0.28450135967553  | 0.03904479630652  | -3.89501487952393 |
| H | -3.79037964032447 | -1.28884220369348 | -3.58803887952393 |
| H | -3.85677264032446 | -0.50388920369348 | -1.24827887952393 |
| H | 6.23836235967553  | -2.81527720369348 | 2.42706912047607  |
| H | 8.43838635967554  | -1.72505120369348 | 2.12433412047607  |
| H | 8.73920535967553  | 0.02055079630652  | 0.37994612047607  |
| H | 6.81896335967553  | 0.64872779630652  | -1.06819287952393 |
| H | 4.62958035967553  | -0.46631820369348 | -0.78365187952393 |
| H | 5.36828335967553  | -4.16587620369348 | -0.42035387952393 |
| H | 5.31560235967553  | -6.62282520369348 | -0.13401987952393 |
| H | 3.87273635967553  | -7.64701920369348 | 1.61211012047607  |
| H | 2.49704435967553  | -6.18412520369348 | 3.07719712047607  |
| H | 2.57375935967553  | -3.72654320369348 | 2.80656512047607  |

|   |                   |                   |                   |
|---|-------------------|-------------------|-------------------|
| H | -0.03089264032447 | -2.18000020369348 | -7.06715387952393 |
| H | 1.28168635967553  | -0.94818020369348 | -8.76537487952393 |
| H | 1.14550535967553  | 1.52999379630652  | -8.89339387952393 |
| H | -0.33014264032447 | 2.75979979630652  | -7.31514087952393 |
| H | -1.66302264032447 | 1.52198479630652  | -5.63809387952393 |
| H | -3.22089464032446 | -1.37106920369348 | -7.45276087952393 |
| H | -4.45206164032447 | -3.38662920369348 | -8.18787087952393 |
| H | -4.38318164032447 | -5.46154420369348 | -6.82098787952393 |
| H | -3.05444764032447 | -5.50051520369348 | -4.71998687952393 |
| H | -1.79991264032447 | -3.49325120369348 | -4.00445187952393 |

**b) Table S2.** Cartesian coordinates for the optimized structure of compound **3**.

Total energy: 2678.67077603 Hartrees

| Atom | x                | y                | z                 |
|------|------------------|------------------|-------------------|
| C    | 3.72842859150736 | 8.97922662424571 | 0.50647943350124  |
| C    | 4.49704459150736 | 9.38979062424571 | -0.59088956649876 |
| C    | 4.79562259150736 | 8.48729362424571 | -1.60892756649876 |
| C    | 4.31987359150736 | 7.17048162424571 | -1.54209056649876 |
| C    | 3.54693259150736 | 6.75693062424571 | -0.44048256649876 |
| C    | 3.26214059150736 | 7.66811062424571 | 0.58449343350124  |
| C    | 4.64101759150736 | 6.21740762424571 | -2.62503356649876 |
| C    | 4.04016459150736 | 4.85896562424571 | -2.56974756649876 |
| C    | 3.22382859150736 | 4.46127662424571 | -1.50027856649876 |
| C    | 3.06347459150736 | 5.35139162424571 | -0.32029156649876 |
| C    | 4.30358959150736 | 3.98629062424571 | -3.65744956649876 |
| C    | 3.77651859150736 | 2.71730562424571 | -3.68616956649876 |
| C    | 2.92731059150736 | 2.28906662424571 | -2.63967756649876 |
| C    | 2.59029759150736 | 3.17981862424571 | -1.57628556649876 |

|   |                   |                   |                   |
|---|-------------------|-------------------|-------------------|
| N | 2.47492659150736  | 0.99718862424571  | -2.61697556649876 |
| C | 1.63789959150736  | 0.59882162424571  | -1.65538356649876 |
| C | 1.06338159150736  | 1.59638262424571  | -0.76369556649876 |
| N | 1.59874659150736  | 2.81654562424571  | -0.71142356649876 |
| C | -0.14086640849264 | 1.39666862424571  | 0.06832343350124  |
| C | 1.40405459150736  | -0.85543237575429 | -1.55720756649876 |
| C | -0.28310040849264 | 2.14135862424571  | 1.25437043350124  |
| C | -1.42119540849264 | 2.02837862424571  | 2.04318343350124  |
| C | -2.47779040849264 | 1.17894262424571  | 1.66231243350124  |
| C | -2.34914340849264 | 0.44573862424571  | 0.46525143350124  |
| C | -1.20324840849264 | 0.55536162424571  | -0.31290856649876 |
| C | 1.45824059150736  | -1.65352037575429 | -2.71401356649876 |
| C | 1.30878459150736  | -3.03314337575429 | -2.64877556649876 |
| C | 1.11862159150736  | -3.67659037575429 | -1.41034056649876 |
| C | 1.07796859150736  | -2.88384937575429 | -0.24491856649876 |
| C | 1.21847459150736  | -1.50393237575429 | -0.32099656649876 |
| N | -3.62902940849264 | 1.04548862424571  | 2.47963343350124  |
| C | -4.92306340849264 | 0.78835962424571  | 1.92160943350124  |
| C | -3.54238340849264 | 1.31965162424571  | 3.89276543350124  |
| N | 0.94258059150736  | -5.08076837575429 | -1.34660756649876 |
| C | 0.46421559150736  | -5.79800637575429 | -2.50318956649876 |
| C | 1.36884759150736  | -5.84442637575429 | -0.21101056649876 |
| O | 2.58181659150736  | 4.95885062424571  | 0.76359543350124  |
| O | 5.37637559150736  | 6.55157662424571  | -3.58339656649876 |
| C | -5.33946140849264 | 1.41687262424571  | 0.73600843350124  |
| C | -6.61009340849264 | 1.16523962424571  | 0.21694043350124  |
| C | -7.48958440849264 | 0.30204862424571  | 0.87731343350124  |
| C | -7.08222940849264 | -0.31307937575429 | 2.06475243350124  |
| C | -5.80801240849264 | -0.07933837575429 | 2.58256543350124  |

|   |                   |                   |                   |
|---|-------------------|-------------------|-------------------|
| C | -2.77823540849264 | 0.45979962424571  | 4.74890643350124  |
| C | -2.70921540849264 | 0.77690062424571  | 6.14939743350124  |
| C | -3.41638640849264 | 1.90643562424571  | 6.64651543350124  |
| C | -4.16405440849264 | 2.69454562424571  | 5.80068843350124  |
| C | -4.22083340849264 | 2.40291162424571  | 4.41834143350124  |
| C | -0.88112440849264 | -5.61040037575429 | -2.96240456649876 |
| C | -1.31090840849264 | -6.33239737575429 | -4.12887356649876 |
| C | -0.40872140849264 | -7.22538737575429 | -4.77065056649876 |
| C | 0.86708159150736  | -7.40414237575429 | -4.28483256649876 |
| C | 1.30595759150736  | -6.68186537575429 | -3.15121556649876 |
| C | 2.58812759150736  | -5.57083237575429 | 0.43075243350124  |
| C | 2.99233359150736  | -6.33708637575429 | 1.52477443350124  |
| C | 2.20128659150736  | -7.39509937575429 | 1.98236343350124  |
| C | 0.99483859150736  | -7.67800837575429 | 1.33539443350124  |
| C | 0.57553059150736  | -6.90700537575429 | 0.25085943350124  |
| C | -2.10465940849264 | -0.70229537575429 | 4.27876343350124  |
| C | -1.38453640849264 | -1.49951737575429 | 5.14190543350124  |
| C | -1.29753940849264 | -1.17564037575429 | 6.51862543350124  |
| C | -1.94815740849264 | -0.06552537575429 | 7.00811343350124  |
| C | -1.81335140849264 | -4.76002837575429 | -2.30452156649876 |
| C | -3.09725640849264 | -4.61411337575429 | -2.78366856649876 |
| C | -3.51521740849264 | -5.30791137575429 | -3.94633656649876 |
| C | -2.64191440849264 | -6.14852337575429 | -4.59898556649876 |
| H | 3.49788859150736  | 9.68023062424571  | 1.29730643350124  |
| H | 4.86128959150736  | 10.40661662424571 | -0.64663956649876 |
| H | 5.39377659150736  | 8.77403862424571  | -2.46166456649876 |
| H | 2.68118059150736  | 7.32499462424571  | 1.42796543350124  |
| H | 4.94641559150736  | 4.35102562424571  | -4.44441356649876 |
| H | 3.99931959150736  | 2.01778962424571  | -4.47899256649876 |

|   |                   |                   |                   |
|---|-------------------|-------------------|-------------------|
| H | 0.50755259150736  | 2.82370162424571  | 1.53132043350124  |
| H | -1.50175940849264 | 2.60488962424571  | 2.95281143350124  |
| H | -3.14751340849264 | -0.21001837575429 | 0.15110743350124  |
| H | -1.13875940849264 | -0.01802737575429 | -1.22618056649876 |
| H | 1.63391059150736  | -1.17375737575429 | -3.66544456649876 |
| H | 1.34768859150736  | -3.62074137575429 | -3.55397756649876 |
| H | 0.93333559150736  | -3.35286337575429 | 0.71683543350124  |
| H | 1.18583259150736  | -0.92636437575429 | 0.59140243350124  |
| H | -4.67148440849264 | 2.09985362424571  | 0.23130843350124  |
| H | -6.91729140849264 | 1.65786362424571  | -0.69624156649876 |
| H | -8.47599640849264 | 0.11490462424571  | 0.47542143350124  |
| H | -7.75272040849264 | -0.98380437575429 | 2.58572143350124  |
| H | -5.49324340849264 | -0.56287837575429 | 3.49643043350124  |
| H | -3.36066940849264 | 2.13250662424571  | 7.70382243350124  |
| H | -4.70308640849264 | 3.55031162424571  | 6.18418343350124  |
| H | -4.79725740849264 | 3.03316362424571  | 3.75558843350124  |
| H | -0.74549540849264 | -7.76734137575429 | -5.64528856649876 |
| H | 1.54780759150736  | -8.08792637575429 | -4.77364856649876 |
| H | 2.31359459150736  | -6.81390937575429 | -2.78244956649876 |
| H | 3.21306659150736  | -4.76654637575429 | 0.06993943350124  |
| H | 3.93440759150736  | -6.11563837575429 | 2.00883543350124  |
| H | 2.52151159150736  | -7.99067237575429 | 2.82629643350124  |
| H | 0.37307659150736  | -8.49379537575429 | 1.67977843350124  |
| H | -0.36188740849264 | -7.12272237575429 | -0.24182056649876 |
| H | -2.16775640849264 | -0.95568737575429 | 3.23128043350124  |
| H | -0.88155940849264 | -2.38151237575429 | 4.76830943350124  |
| H | -0.72297040849264 | -1.80755337575429 | 7.18264143350124  |
| H | -1.89403440849264 | 0.18231862424571  | 8.06088043350124  |
| H | -1.50208040849264 | -4.23068337575429 | -1.41660856649876 |

|   |                   |                   |                   |
|---|-------------------|-------------------|-------------------|
| H | -3.79443740849264 | -3.96666037575429 | -2.26877956649876 |
| H | -4.52443240849264 | -5.17853237575429 | -4.31381256649876 |
| H | -2.95818640849264 | -6.68979037575429 | -5.48196956649876 |

**c) Table S3.** Cartesian coordinates for the optimized structure of compound **4**.

Total energy = 2829.45513666 Hartrees

| Atom | x                 | y                 | z                 |
|------|-------------------|-------------------|-------------------|
| C    | 5.47222270943047  | -3.18340805972063 | 7.61137025892681  |
| C    | 4.94118470943047  | -2.98410605972063 | 8.89273725892681  |
| C    | 3.77302870943047  | -2.24310305972063 | 9.05502225892681  |
| C    | 3.12144970943047  | -1.70491105972063 | 7.93672025892681  |
| C    | 3.65285570943047  | -1.90601905972063 | 6.64868325892681  |
| C    | 4.83548270943047  | -2.64103505972063 | 6.49650425892681  |
| C    | 1.88209770943047  | -0.91953905972063 | 8.11562425892681  |
| C    | 1.16194770943047  | -0.45418205972063 | 6.90213225892681  |
| C    | 1.65919470943047  | -0.70299105972063 | 5.61334925892681  |
| C    | 3.00389270943047  | -1.31275105972063 | 5.44405125892681  |
| C    | -0.06702829056953 | 0.22793294027937  | 7.09577425892681  |
| C    | -0.80130329056953 | 0.67577594027937  | 6.02329325892681  |
| C    | -0.34799229056953 | 0.41890094027937  | 4.70885325892681  |
| C    | 0.84910670943047  | -0.32876205972063 | 4.49419125892681  |
| N    | -1.02684829056953 | 0.94031394027937  | 3.64067425892681  |
| C    | -0.62729529056953 | 0.66788394027937  | 2.39498425892681  |
| C    | 0.40274370943047  | -0.34256805972063 | 2.19053525892681  |
| N    | 1.13742270943047  | -0.74735305972063 | 3.22808125892681  |
| C    | 0.67430170943047  | -1.03736705972063 | 0.91625825892681  |
| C    | -1.25117029056953 | 1.46898494027937  | 1.32455425892681  |
| C    | -0.31585629056953 | -1.28091705972063 | -0.05432674107319 |

|   |                   |                   |                   |
|---|-------------------|-------------------|-------------------|
| C | -0.03373229056953 | -2.00575105972063 | -1.20590474107319 |
| C | 1.25907770943047  | -2.51905705972063 | -1.43593074107319 |
| C | 2.25115570943047  | -2.28846605972063 | -0.45991774107319 |
| C | 1.95918670943047  | -1.57262505972063 | 0.69257625892681  |
| C | -2.56729629056953 | 1.94397194027937  | 1.48185725892681  |
| C | -3.16190429056953 | 2.75833894027937  | 0.52786425892681  |
| C | -2.45098129056953 | 3.15348194027937  | -0.62468574107319 |
| C | -1.12539329056953 | 2.69769994027937  | -0.77757374107319 |
| C | -0.54304029056953 | 1.87251594027937  | 0.17643825892681  |
| N | 1.55094970943047  | -3.25191205972063 | -2.61078674107319 |
| C | 2.86877570943047  | -3.23937805972063 | -3.17954774107319 |
| C | 0.53607070943047  | -4.03097405972063 | -3.26174074107319 |
| N | -3.04801129056953 | 3.99033394027937  | -1.59633274107319 |
| C | -4.46542729056953 | 3.96217894027937  | -1.82266074107319 |
| C | -2.25185229056953 | 4.90083594027937  | -2.37031774107319 |
| O | 3.61638570943047  | -1.31353005972063 | 4.35481025892681  |
| O | 1.42984670943047  | -0.67813705972063 | 9.25965925892681  |
| C | 3.49330470943047  | -4.44412505972063 | -3.54865374107319 |
| C | 4.75850170943047  | -4.43807705972063 | -4.12254474107319 |
| C | 5.43404670943047  | -3.22746105972063 | -4.32340574107319 |
| C | 4.82782370943047  | -2.02210505972063 | -3.95617774107319 |
| C | 3.54591470943047  | -2.03407805972063 | -3.39806074107319 |
| C | 0.32901870943047  | -3.91171905972063 | -4.64752774107319 |
| C | -0.63565929056953 | -4.68022005972063 | -5.28721374107319 |
| C | -1.42522429056953 | -5.57298305972063 | -4.55102874107319 |
| C | -1.23423029056953 | -5.69824705972063 | -3.17139774107319 |
| C | -0.24817729056953 | -4.93619605972063 | -2.53743374107319 |
| C | -5.20066929056953 | 5.15992094027937  | -1.87125474107319 |
| C | -6.56887429056953 | 5.14040594027937  | -2.11170974107319 |



|   |                   |                   |                   |
|---|-------------------|-------------------|-------------------|
| C | -7.23434229056953 | 3.92105194027937  | -2.29259774107319 |
| C | -6.51712129056953 | 2.72173994027937  | -2.24175274107319 |
| C | -5.13686929056953 | 2.75003294027937  | -2.01964474107319 |
| C | -2.39176529056953 | 4.95501294027937  | -3.76841874107319 |
| C | -1.64192729056953 | 5.85187794027937  | -4.51937774107319 |
| C | -0.72404929056953 | 6.70205794027937  | -3.88915374107319 |
| C | -0.57000729056953 | 6.65473094027937  | -2.50003274107319 |
| C | -1.34246529056953 | 5.76398594027937  | -1.74853274107319 |
| O | -2.37018929056953 | -6.28723705972063 | -5.28628874107319 |
| C | -3.22007029056953 | -7.24226405972063 | -4.59899574107319 |
| O | 6.70100470943047  | -3.33344705972063 | -4.89510674107319 |
| O | -8.60661929056953 | 4.01325094027937  | -2.51756374107319 |
| O | -0.01680029056953 | 7.55498194027937  | -4.73447074107319 |
| C | 7.46899070943047  | -2.12466105972063 | -5.13109574107319 |
| C | -9.36925129056953 | 2.79598394027937  | -2.72619674107319 |
| C | 0.94278570943047  | 8.47988494027937  | -4.15899874107319 |
| H | 6.38033870943047  | -3.75754305972063 | 7.48609225892681  |
| H | 5.43955970943047  | -3.40278505972063 | 9.75649625892681  |
| H | 3.34655270943047  | -2.06560005972063 | 10.03163925892681 |
| H | 5.23448670943047  | -2.76871905972063 | 5.50091725892681  |
| H | -0.38905629056953 | 0.39549794027937  | 8.11255225892681  |
| H | -1.71662629056953 | 1.23697694027937  | 6.14519825892681  |
| H | -1.31841029056953 | -0.90544705972063 | 0.08946925892681  |
| H | -0.81240129056953 | -2.17621705972063 | -1.93437274107319 |
| H | 3.24424770943047  | -2.68721805972063 | -0.60501374107319 |
| H | 2.71220370943047  | -1.43496605972063 | 1.45508925892681  |
| H | -3.10846429056953 | 1.67710494027937  | 2.37759825892681  |
| H | -4.17355929056953 | 3.10630594027937  | 0.67496625892681  |
| H | -0.55787029056953 | 2.99195894027937  | -1.64773174107319 |

|   |                    |                   |                   |
|---|--------------------|-------------------|-------------------|
| H | 0.47491870943047   | 1.54262694027937  | 0.02784925892681  |
| H | 2.97894370943047   | -5.38025105972063 | -3.38414574107319 |
| H | 5.24970270943047   | -5.35575205972063 | -4.41141274107319 |
| H | 5.32669270943047   | -1.07678505972063 | -4.10806074107319 |
| H | 3.07220070943047   | -1.10085705972063 | -3.12797074107319 |
| H | 0.93124070943047   | -3.21700505972063 | -5.21569874107319 |
| H | -0.80455729056953  | -4.60028505972063 | -6.35115874107319 |
| H | -1.82549029056953  | -6.38604205972063 | -2.58572574107319 |
| H | -0.09005529056953  | -5.04405005972063 | -1.47358074107319 |
| H | -4.69162629056953  | 6.10144394027937  | -1.72189574107319 |
| H | -7.14592129056953  | 6.05263594027937  | -2.15272374107319 |
| H | -7.00788829056953  | 1.77098794027937  | -2.38599974107319 |
| H | -4.58032729056953  | 1.82368894027937  | -1.99622074107319 |
| H | -3.09293329056953  | 4.29357794027937  | -4.25735874107319 |
| H | -1.73987529056953  | 5.90600994027937  | -5.59377374107319 |
| H | 0.12590870943047   | 7.30575494027937  | -1.99262374107319 |
| H | -1.23460629056953  | 5.73849194027937  | -0.67331574107319 |
| H | -3.85802229056953  | -7.66014605972063 | -5.37055474107319 |
| H | -2.63086829056953  | -8.03882905972063 | -4.13877574107319 |
| H | -3.83459229056953  | -6.75244205972063 | -3.83993574107319 |
| H | 8.40316270943047   | -2.46321805972063 | -5.56653174107319 |
| H | 6.95770670943047   | -1.45979805972063 | -5.83120674107319 |
| H | 7.67001270943047   | -1.59382105972063 | -4.19761574107319 |
| H | -10.39184929056953 | 3.12510594027937  | -2.87720174107319 |
| H | -9.02255629056953  | 2.25739894027937  | -3.61122474107319 |
| H | -9.31973929056953  | 2.14158894027937  | -1.85267374107319 |
| H | 1.35205670943047   | 9.02452394027937  | -5.00320674107319 |
| H | 0.45843470943047   | 9.17763794027937  | -3.47201974107319 |
| H | 1.74491470943047   | 7.94888294027937  | -3.64110474107319 |

**d) Table S4.** Cartesian coordinates for the optimized structure of compound **5**.

Total energy = 2780.36899014 Hartrees

| Atom | x                 | y                 | z                 |
|------|-------------------|-------------------|-------------------|
| C    | 8.79653517647612  | 2.57649485852145  | 3.73189451819118  |
| C    | 9.43890117647612  | 3.62176285852145  | 3.05531451819118  |
| C    | 8.93315217647612  | 4.08105685852145  | 1.84129151819118  |
| C    | 7.77526717647612  | 3.50562985852145  | 1.30038451819118  |
| C    | 7.12715117647612  | 2.45643285852145  | 1.98074451819118  |
| C    | 7.65094817647612  | 1.99236285852145  | 3.19400651819118  |
| C    | 7.24645217647612  | 3.99485085852145  | 0.01086151819118  |
| C    | 5.96147717647612  | 3.42970085852145  | -0.48517848180882 |
| C    | 5.28313317647612  | 2.42905885852145  | 0.22167351819118  |
| C    | 5.91772217647612  | 1.79928385852145  | 1.41152851819118  |
| C    | 5.43592917647612  | 3.96565685852145  | -1.69112048180882 |
| C    | 4.24966917647612  | 3.50514285852145  | -2.20868848180882 |
| C    | 3.52035517647612  | 2.51565785852145  | -1.50798248180882 |
| C    | 3.99633117647612  | 2.02238985852145  | -0.25646348180882 |
| N    | 2.38166117647612  | 1.99138085852145  | -2.05771448180882 |
| C    | 1.66384217647612  | 1.09390585852145  | -1.37858048180882 |
| C    | 1.99720417647612  | 0.82810785852145  | 0.00942551819118  |
| N    | 3.16591617647612  | 1.24407385852145  | 0.49617851819118  |
| C    | 1.10273917647612  | 0.17712885852145  | 0.99416451819118  |
| C    | 0.60190517647612  | 0.40229585852145  | -2.14249248180882 |
| C    | -0.29664882352388 | 0.31265685852145  | 0.95692851819118  |
| C    | -1.09644682352388 | -0.25413114147855 | 1.94471751819118  |
| C    | -0.51571282352388 | -0.96888914147855 | 3.00509951819118  |
| C    | 0.88133317647612  | -1.10299814147855 | 3.05254651819118  |
| C    | 1.67724017647612  | -0.53086114147855 | 2.06667251819118  |

|   |                   |                   |                   |
|---|-------------------|-------------------|-------------------|
| C | -0.06190182352388 | 1.07833885852145  | -3.18250848180882 |
| C | -1.01069682352388 | 0.43340785852145  | -3.96727748180882 |
| C | -1.32115782352388 | -0.91843114147855 | -3.73966048180882 |
| C | -0.64895482352388 | -1.60631814147855 | -2.71660748180882 |
| C | 0.29730817647612  | -0.95446214147855 | -1.93214948180882 |
| N | -1.33136482352388 | -1.56961414147855 | 4.01731251819118  |
| C | -1.01804882352388 | -2.91029014147855 | 4.44143651819118  |
| C | -2.40623682352388 | -0.87151414147855 | 4.60508551819118  |
| N | -2.27414182352388 | -1.60126014147855 | -4.55875448180882 |
| C | -3.48744582352388 | -0.99295314147855 | -4.94466548180882 |
| C | -1.96528782352388 | -2.93845014147855 | -5.00008648180882 |
| O | 5.49821617647612  | 0.73499685852145  | 1.91316451819118  |
| O | 7.84108817647612  | 4.88373485852145  | -0.64043648180882 |
| C | -0.88173982352388 | -3.93132414147855 | 3.49124151819118  |
| C | -0.55745982352388 | -5.22603714147855 | 3.89978951819118  |
| C | -0.37987182352388 | -5.51449514147855 | 5.25603951819118  |
| C | -0.52077882352388 | -4.49637414147855 | 6.20388051819118  |
| C | -0.83046782352388 | -3.19648814147855 | 5.80119451819118  |
| C | -2.38056282352388 | 0.53726485852145  | 4.71743751819118  |
| C | -3.43762682352388 | 1.21949585852145  | 5.30044851819118  |
| C | -4.53616682352388 | 0.50402585852145  | 5.78604651819118  |
| C | -4.58333582352388 | -0.88984114147855 | 5.69187851819118  |
| C | -3.52779182352388 | -1.57141514147855 | 5.10501051819118  |
| C | -4.11932982352388 | -0.04239314147855 | -4.11146548180882 |
| C | -5.31366682352388 | 0.54996685852145  | -4.49357148180882 |
| C | -5.89870282352388 | 0.19652485852145  | -5.71286448180882 |
| C | -5.29744982352388 | -0.74579414147855 | -6.55175148180882 |
| C | -4.10061882352388 | -1.33432414147855 | -6.17099448180882 |
| C | -0.74817082352388 | -3.20002514147855 | -5.64362548180882 |

|   |                   |                   |                   |
|---|-------------------|-------------------|-------------------|
| C | -0.44211482352388 | -4.49831814147855 | -6.05483348180882 |
| C | -1.35027082352388 | -5.53924414147855 | -5.83975648180882 |
| C | -2.56648282352388 | -5.27621414147855 | -5.20217148180882 |
| C | -2.87286682352388 | -3.98305214147855 | -4.77529848180882 |
| N | -5.64061182352388 | 1.21789485852145  | 6.39896151819118  |
| O | -5.58663982352388 | 2.48711985852145  | 6.44793851819118  |
| O | -6.61428382352388 | 0.54331485852145  | 6.86063151819118  |
| N | -7.14953182352388 | 0.81559085852145  | -6.11201648180882 |
| H | 9.19110817647612  | 2.21940685852145  | 4.67340351819118  |
| H | 10.32939217647612 | 4.07071485852145  | 3.47341651819118  |
| H | 9.41444417647612  | 4.87840385852145  | 1.29391451819118  |
| H | 7.14841117647612  | 1.17595085852145  | 3.69157351819118  |
| H | 6.01329617647612  | 4.72942485852145  | -2.18991548180882 |
| H | 3.85177817647612  | 3.86313685852145  | -3.14715248180882 |
| H | -0.76715282352388 | 0.86662585852145  | 0.15784651819118  |
| H | -2.17024782352388 | -0.14329314147855 | 1.89768451819118  |
| H | 1.33735017647612  | -1.64438914147855 | 3.86884051819118  |
| H | 2.75408717647612  | -0.59533114147855 | 2.12420151819118  |
| H | 0.19733917647612  | 2.10759685852145  | -3.38053848180882 |
| H | -1.50181982352388 | 0.96821685852145  | -4.76736148180882 |
| H | -0.86576782352388 | -2.65044414147855 | -2.54420648180882 |
| H | 0.80681617647612  | -1.50836714147855 | -1.15723648180882 |
| H | -1.02957782352388 | -3.70605014147855 | 2.44443251819118  |
| H | -0.45320382352388 | -6.00898214147855 | 3.16080651819118  |
| H | -0.13323282352388 | -6.51921514147855 | 5.57043751819118  |
| H | -0.37712982352388 | -4.70949714147855 | 7.25447251819118  |
| H | -0.92454482352388 | -2.40457414147855 | 6.53092051819118  |
| H | -1.52324782352388 | 1.08655585852145  | 4.36041051819118  |
| H | -3.42145882352388 | 2.29319185852145  | 5.40122551819118  |

|   |                   |                   |                   |
|---|-------------------|-------------------|-------------------|
| H | -5.44792182352388 | -1.41466814147855 | 6.06641651819118  |
| H | -3.56762482352388 | -2.64631614147855 | 5.01983751819118  |
| H | -3.67587882352388 | 0.21558185852145  | -3.16220748180882 |
| H | -5.80922282352388 | 1.26850985852145  | -3.86004248180882 |
| H | -5.76687982352388 | -0.99188614147855 | -7.49105248180882 |
| H | -3.62687682352388 | -2.05158414147855 | -6.82318248180882 |
| H | -0.05324982352388 | -2.39053114147855 | -5.81719048180882 |
| H | 0.49873317647612  | -4.69320714147855 | -6.55140848180882 |
| H | -1.11326782352388 | -6.54291814147855 | -6.16475848180882 |
| H | -3.27156782352388 | -6.07741314147855 | -5.02681748180882 |
| H | -3.80658682352388 | -3.77893914147855 | -4.27014348180882 |
| O | -7.66137982352388 | 1.69078685852145  | -5.34552648180882 |
| O | -7.67781582352388 | 0.45551085852145  | -7.21050348180882 |

e) **Table S5.** Cartesian coordinates for the optimized structure of compound **6**.

Total energy = 3052.37826672 Hartrees

| Atom | x                 | y                 | z                |
|------|-------------------|-------------------|------------------|
| C    | -6.17754158572630 | -0.60005901954972 | 8.40096258866334 |
| C    | -7.27678258572630 | -1.46680101954972 | 8.34060358866333 |
| C    | -7.59850958572630 | -2.10160801954972 | 7.14319758866333 |
| C    | -6.81738858572630 | -1.88225701954972 | 6.00021458866334 |
| C    | -5.71102758572630 | -1.01332501954972 | 6.06012658866333 |
| C    | -5.40327958572630 | -0.36918001954972 | 7.26520358866334 |
| C    | -7.16557258572630 | -2.55623401954972 | 4.73241458866333 |
| C    | -6.25912058572630 | -2.37798301954972 | 3.56646658866334 |
| C    | -5.12217858572630 | -1.56163301954972 | 3.64149558866333 |
| C    | -4.88477758572630 | -0.73061001954972 | 4.85218458866334 |
| C    | -6.57545758572630 | -3.09228001954972 | 2.38095458866333 |

|   |                   |                   |                   |
|---|-------------------|-------------------|-------------------|
| C | -5.77991758572630 | -2.99287601954972 | 1.26509058866333  |
| C | -4.60712058572630 | -2.20353301954972 | 1.31172458866333  |
| C | -4.23504958572630 | -1.53792801954972 | 2.51802258866334  |
| N | -3.85589358572630 | -2.03425501954972 | 0.17986058866334  |
| C | -2.72326358572630 | -1.32897901954972 | 0.22906558866334  |
| C | -2.20652258572630 | -0.91149301954972 | 1.52251058866333  |
| N | -2.99549358572630 | -0.97263601954972 | 2.59563158866333  |
| C | -0.81756358572630 | -0.47569401954972 | 1.78578058866333  |
| C | -2.11013758572630 | -0.99617301954972 | -1.07432341133666 |
| C | 0.28646641427370  | -0.96247301954972 | 1.06222858866334  |
| C | 1.58315041427370  | -0.58065101954972 | 1.38957158866334  |
| C | 1.81964141427370  | 0.30011898045028  | 2.45999358866333  |
| C | 0.72104541427370  | 0.78181098045028  | 3.19451858866333  |
| C | -0.57201258572630 | 0.39353298045028  | 2.86668858866333  |
| C | -1.47699158572630 | 0.23855698045028  | -1.30779141133667 |
| C | -0.96927958572630 | 0.55879098045028  | -2.56212841133667 |
| C | -1.07996058572630 | -0.34922801954972 | -3.63043341133667 |
| C | -1.72070958572630 | -1.58115801954972 | -3.40628141133667 |
| C | -2.23251158572630 | -1.89162401954972 | -2.15241041133666 |
| N | 3.14531341427370  | 0.70541798045028  | 2.79281258866333  |
| C | 3.38598441427370  | 2.06605298045028  | 3.18791158866333  |
| C | 4.22977141427370  | -0.21005001954972 | 2.72781558866333  |
| N | -0.54598958572630 | -0.03822501954972 | -4.91447641133666 |
| C | -0.63998258572630 | 1.27376298045028  | -5.45216241133667 |
| C | 0.09944041427370  | -1.07407801954972 | -5.67420241133667 |
| O | -4.05746858572630 | 0.20503998045028  | 4.87736458866333  |
| O | -8.18029058572630 | -3.28561201954972 | 4.64332158866333  |
| C | 2.87985441427370  | 3.12514598045028  | 2.42004658866334  |
| C | 3.10853741427370  | 4.44505798045028  | 2.81152858866333  |

|   |                   |                   |                   |
|---|-------------------|-------------------|-------------------|
| C | 3.85446441427370  | 4.72250898045028  | 3.96088158866333  |
| C | 4.36486441427370  | 3.66709398045028  | 4.72281858866333  |
| C | 4.12720841427370  | 2.34476598045028  | 4.34597758866334  |
| C | 5.50354441427370  | 0.21866198045028  | 2.30830858866334  |
| C | 6.56225941427370  | -0.68008101954972 | 2.25808958866333  |
| C | 6.37990641427370  | -2.02443301954972 | 2.61267058866333  |
| C | 5.10925441427370  | -2.45637001954972 | 3.03621658866333  |
| C | 4.05210441427370  | -1.56253001954972 | 3.09735758866333  |
| C | 0.39875541427370  | 1.79576898045028  | -6.24609541133666 |
| C | 0.29183141427370  | 3.07162498045028  | -6.78651341133667 |
| C | -0.84068258572630 | 3.86154098045028  | -6.54275041133667 |
| C | -1.88089358572630 | 3.34387398045028  | -5.74899241133667 |
| C | -1.78447958572630 | 2.06818698045028  | -5.21603041133667 |
| C | 1.08290241427370  | -1.87703001954972 | -5.07820641133666 |
| C | 1.70111741427370  | -2.88879701954972 | -5.81434941133667 |
| C | 1.35683041427370  | -3.10001501954972 | -7.15275541133667 |
| C | 0.38153141427370  | -2.29498801954972 | -7.74927541133667 |
| C | -0.25172758572630 | -1.29144901954972 | -7.01484941133667 |
| N | 7.52476541427370  | -2.85444301954972 | 2.51721258866333  |
| N | -0.84378158572630 | 5.14672298045028  | -7.14084641133666 |
| N | 7.35231141427370  | -4.08836301954972 | 2.81748658866333  |
| N | -1.86553858572630 | 5.87973298045028  | -6.89426141133666 |
| C | -1.86715158572630 | 7.16762598045028  | -7.50525241133666 |
| C | 8.50796741427370  | -4.91752201954972 | 2.72230058866333  |
| C | 9.78085941427370  | -4.46642801954972 | 2.33296458866333  |
| C | 10.84099141427370 | -5.36624001954972 | 2.27279258866333  |
| C | 10.64467541427370 | -6.71613601954972 | 2.59800958866334  |
| C | 9.37846941427370  | -7.16418201954972 | 2.98577458866334  |
| C | 8.31226941427370  | -6.26666601954972 | 3.04769358866333  |



|   |                   |                   |                   |
|---|-------------------|-------------------|-------------------|
| C | -0.84832858572630 | 7.65084498045028  | -8.34417441133666 |
| C | -0.95387058572630 | 8.92688798045028  | -8.88974141133667 |
| C | -2.06864658572630 | 9.72913698045028  | -8.60643941133667 |
| C | -3.08176558572630 | 9.24791498045028  | -7.77191241133666 |
| C | -2.98130858572630 | 7.96950598045028  | -7.22256341133667 |
| H | -5.92934458572630 | -0.10619501954972 | 9.33063358866334  |
| H | -7.87792258572630 | -1.64094601954972 | 9.22255058866333  |
| H | -8.44626658572630 | -2.76677301954972 | 7.06579158866333  |
| H | -4.56023358572630 | 0.30573398045028  | 7.28512458866334  |
| H | -7.47042958572630 | -3.69605301954972 | 2.38703358866333  |
| H | -6.02308058572630 | -3.48924901954972 | 0.33672858866333  |
| H | 0.13736741427370  | -1.64656701954972 | 0.23982458866333  |
| H | 2.41622641427370  | -0.96280801954972 | 0.81806558866333  |
| H | 0.88850541427370  | 1.44931498045028  | 4.02728558866333  |
| H | -1.41178758572630 | 0.73170698045028  | 3.45622358866333  |
| H | -1.38093958572630 | 0.95548898045028  | -0.50533441133667 |
| H | -0.48363158572630 | 1.51083098045028  | -2.71827741133666 |
| H | -1.82200958572630 | -2.28378101954972 | -4.22049641133666 |
| H | -2.75140558572630 | -2.82527301954972 | -1.99395541133667 |
| H | 2.31406841427370  | 2.90946098045028  | 1.52472258866333  |
| H | 2.71340341427370  | 5.25476098045028  | 2.21276358866333  |
| H | 4.03452141427370  | 5.74624398045028  | 4.25905758866333  |
| H | 4.93721941427370  | 3.87143898045028  | 5.61777358866334  |
| H | 4.50997641427370  | 1.52807398045028  | 4.94154758866334  |
| H | 5.65206141427370  | 1.24872598045028  | 2.02026058866334  |
| H | 7.54394541427370  | -0.36743401954972 | 1.93170958866333  |
| H | 4.98276641427370  | -3.48839801954972 | 3.32567458866334  |
| H | 3.08337341427370  | -1.89471601954972 | 3.44117858866333  |
| H | 1.28099841427370  | 1.20091298045028  | -6.43007541133666 |

|   |                   |                   |                   |
|---|-------------------|-------------------|-------------------|
| H | 1.08275241427370  | 3.48770398045028  | -7.39415141133667 |
| H | -2.75622858572630 | 3.95245898045028  | -5.58082641133667 |
| H | -2.59495758572630 | 1.66801798045028  | -4.62453141133667 |
| H | 1.35738641427370  | -1.70374101954972 | -4.04727341133666 |
| H | 2.45892441427370  | -3.50236001954972 | -5.34583941133666 |
| H | 1.84147641427370  | -3.88067601954972 | -7.72289141133666 |
| H | 0.10393141427370  | -2.45510901954972 | -8.78250241133667 |
| H | -1.01497658572630 | -0.67683401954972 | -7.47087541133667 |
| H | 9.90916841427370  | -3.42360001954972 | 2.08684358866333  |
| H | 11.82200941427370 | -5.02159001954972 | 1.97340658866333  |
| H | 11.47339541427370 | -7.40986301954972 | 2.54900158866333  |
| H | 9.22403741427370  | -8.20459701954972 | 3.23787958866334  |
| H | 7.32153041427370  | -6.58111001954972 | 3.34335658866333  |
| H | 0.00011641427370  | 7.01621198045028  | -8.54885141133667 |
| H | -0.17119958572630 | 9.30130598045028  | -9.53628941133666 |
| H | -2.14401358572630 | 10.72000098045028 | -9.03416341133666 |
| H | -3.94283658572630 | 9.86433298045028  | -7.55184741133666 |
| H | -3.74719858572630 | 7.56803998045028  | -6.57444041133667 |

**f) Table S6.** Cartesian coordinates for the optimized structure of compound 7.

Total energy = 2482.10837061 Hartrees

| Atom | x                 | y                 | z                |
|------|-------------------|-------------------|------------------|
| C    | -5.82802070086417 | 0.45447921586014  | 7.50571025777396 |
| C    | -5.27299170086417 | -0.01128478413986 | 8.70513225777396 |
| C    | -4.02368870086417 | -0.62717978413986 | 8.70151825777396 |
| C    | -3.31581970086417 | -0.77308078413986 | 7.50042325777396 |
| C    | -3.87177870086417 | -0.30464978413986 | 6.29502625777396 |
| C    | -5.13432970086417 | 0.30201021586014  | 6.30656125777396 |

|   |                   |                   |                   |
|---|-------------------|-------------------|-------------------|
| C | -1.99073370086417 | -1.42840478413986 | 7.50307125777396  |
| C | -1.22763670086417 | -1.47934778413986 | 6.22939025777396  |
| C | -1.75622370086417 | -0.96300978413986 | 5.03584825777396  |
| C | -3.16174770086417 | -0.48259178413986 | 4.99552425777396  |
| C | 0.07174629913583  | -2.04771778413986 | 6.27076425777396  |
| C | 0.84521329913583  | -2.12230878413986 | 5.13654225777396  |
| C | 0.35827029913583  | -1.58897878413986 | 3.92105325777396  |
| C | -0.91498670086417 | -0.94427078413986 | 3.87808525777396  |
| N | 1.08243929913583  | -1.74522378413986 | 2.76972225777396  |
| C | 0.64688929913583  | -1.20671178413986 | 1.62715225777396  |
| C | -0.48401070086417 | -0.28816078413986 | 1.66746725777396  |
| N | -1.25294970086417 | -0.24437978413986 | 2.75656425777396  |
| C | -0.82815970086417 | 0.68310321586014  | 0.61027225777396  |
| C | 1.33909029913583  | -1.63862478413986 | 0.39824925777396  |
| C | 0.13274729913583  | 1.27460021586014  | -0.23107574222604 |
| C | -0.22352870086417 | 2.24257421586014  | -1.16255074222604 |
| C | -1.56427870086417 | 2.65608921586014  | -1.29539374222604 |
| C | -2.52777470086417 | 2.07903121586014  | -0.44161774222604 |
| C | -2.16298370086417 | 1.12159121586014  | 0.49437925777396  |
| C | 2.69948329913583  | -1.99761178413986 | 0.44742025777396  |
| C | 3.36328629913583  | -2.47168878413986 | -0.67606774222604 |
| C | 2.68209329913583  | -2.63161878413986 | -1.90047174222604 |
| C | 1.31504629913583  | -2.28957378413986 | -1.95125474222604 |
| C | 0.66244129913583  | -1.80311378413986 | -0.82564474222604 |
| N | -1.92229870086417 | 3.64691521586014  | -2.24189974222604 |
| C | -3.20992570086417 | 3.65867721586014  | -2.86308174222604 |
| C | -0.97784270086417 | 4.67556121586014  | -2.59305574222604 |
| N | 3.36293829913583  | -3.10657278413986 | -3.04676674222604 |
| C | 4.76566129913583  | -2.82488778413986 | -3.21333874222604 |

|   |                   |                   |                   |
|---|-------------------|-------------------|-------------------|
| C | 2.69293629913583  | -3.86575078413986 | -4.05684674222604 |
| O | -3.77341470086417 | -0.26213878413986 | 3.92835425777396  |
| O | -1.50729370086417 | -1.90310478413986 | 8.55800725777396  |
| C | -3.80845870086417 | 2.46426921586014  | -3.30101474222604 |
| C | -5.05946770086417 | 2.48861921586014  | -3.91727574222604 |
| C | -5.72641770086417 | 3.70004121586014  | -4.12481474222604 |
| C | -5.12729370086417 | 4.89058421586014  | -3.70335974222604 |
| C | -3.88268270086417 | 4.87436821586014  | -3.07297974222604 |
| C | -0.40630670086417 | 5.49104721586014  | -1.60638474222604 |
| C | 0.50885229913583  | 6.48381721586014  | -1.94278374222604 |
| C | 0.86698529913583  | 6.70872021586014  | -3.28789974222604 |
| C | 0.28082829913583  | 5.89295921586014  | -4.27712374222604 |
| C | -0.61803470086417 | 4.88854621586014  | -3.93061074222604 |
| C | 5.23566029913583  | -1.50444878413986 | -3.21325174222604 |
| C | 6.59050929913583  | -1.22871778413986 | -3.37063774222604 |
| C | 7.52160129913583  | -2.27153378413986 | -3.55502274222604 |
| C | 7.04154229913583  | -3.59721678413986 | -3.56604174222604 |
| C | 5.68762429913583  | -3.86552078413986 | -3.38871474222604 |
| C | 1.77247029913583  | -4.87019978413986 | -3.71006274222604 |
| C | 1.13554029913583  | -5.61400578413986 | -4.70335474222604 |
| C | 1.41647829913583  | -5.38450578413986 | -6.05390474222604 |
| C | 2.34264929913583  | -4.39673478413986 | -6.40089274222604 |
| C | 2.97391129913583  | -3.63819978413986 | -5.41451174222604 |
| N | 1.76926229913583  | 7.70357021586014  | -3.62742574222604 |
| N | 8.86951429913583  | -2.00131978413986 | -3.72178874222604 |
| H | -6.79899870086417 | 0.93115921586014  | 7.50879025777396  |
| H | -5.81556070086417 | 0.10422221586014  | 9.63360925777396  |
| H | -3.57578270086417 | -1.00414278413986 | 9.60951425777396  |
| H | -5.54906470086417 | 0.63897121586014  | 5.36786525777396  |

|   |                   |                   |                   |
|---|-------------------|-------------------|-------------------|
| H | 0.41652129913583  | -2.43448678413986 | 7.21795625777396  |
| H | 1.81797429913583  | -2.59281778413986 | 5.13195825777396  |
| H | 1.17026529913583  | 0.98346221586014  | -0.15584574222604 |
| H | 0.53377129913583  | 2.68419021586014  | -1.79295874222604 |
| H | -3.55732370086417 | 2.39850921586014  | -0.50605074222604 |
| H | -2.89800570086417 | 0.71313321586014  | 1.17290525777396  |
| H | 3.22252129913583  | -1.91257378413986 | 1.38855825777396  |
| H | 4.40922929913583  | -2.73302078413986 | -0.61306374222604 |
| H | 0.77011729913583  | -2.40179678413986 | -2.87660074222604 |
| H | -0.38557270086417 | -1.55153178413986 | -0.89970074222604 |
| H | -3.29061270086417 | 1.52666221586014  | -3.15870274222604 |
| H | -5.50643870086417 | 1.56013921586014  | -4.24774674222604 |
| H | -6.69391670086417 | 3.71563321586014  | -4.60783674222604 |
| H | -5.63317870086417 | 5.83514421586014  | -3.85524774222604 |
| H | -3.42641570086417 | 5.79608121586014  | -2.74160074222604 |
| H | -0.67900470086417 | 5.33974821586014  | -0.57089674222604 |
| H | 0.94127529913583  | 7.10043421586014  | -1.16434774222604 |
| H | 0.54169329913583  | 6.04369021586014  | -5.31753174222604 |
| H | -1.05118670086417 | 4.26531321586014  | -4.70096274222604 |
| H | 4.53295329913583  | -0.69250278413986 | -3.08445774222604 |
| H | 6.93340829913583  | -0.20131378413986 | -3.36345574222604 |
| H | 7.73705929913583  | -4.41606478413986 | -3.70319874222604 |
| H | 5.33772429913583  | -4.88878478413986 | -3.38983974222604 |
| H | 1.56515029913583  | -5.06483078413986 | -2.66759874222604 |
| H | 0.43019329913583  | -6.38408278413986 | -4.41964574222604 |
| H | 0.92521729913583  | -5.96741278413986 | -6.82101774222604 |
| H | 2.56908029913583  | -4.20794378413986 | -7.44215474222604 |
| H | 3.68492329913583  | -2.87153578413986 | -5.68693174222604 |
| H | 2.18201629913583  | 8.28836121586014  | -2.92602474222604 |

|   |                  |                   |                   |
|---|------------------|-------------------|-------------------|
| H | 2.02014629913583 | 7.86995921586014  | -4.58327374222604 |
| H | 9.53318229913583 | -2.74118078413986 | -3.85024474222604 |
| H | 9.21449729913583 | -1.06055178413986 | -3.70518774222604 |
